# Supplementary material for: Sleep-Cognition Hypothesis In maritime Pilots, what is the effect of long-term work-related poor sleep on cognition and amyloid accumulation in healthy middle-aged maritime pilots: methodology of a case–control study
Source: PubMed Central journal article supplement — BMJ Open. 2019 Jun 27;9(6):e026992. doi: 10.1136/bmjopen-2018-026992 (PMC6597630; doi:10.1136/bmjopen-2018-026992), 2019-06-27
Supplement: bmjopen-2018-026992.draft_revisions.pdf [file bmjopen-2018-026992.draft_revisions.pdf]

# BMJ Open

BMJ Open is committed to open peer review. As part of this commitment we make the peer review history of every article we publish publicly available.

When an article is published we post the peer reviewers' comments and the authors' responses online. We also post the versions of the paper that were used during peer review. These are the versions that the peer review comments apply to.

The versions of the paper that follow are the versions that were submitted during the peer review process. They are not the versions of record or the final published versions. They should not be cited or distributed as the published version of this manuscript.

BMJ Open is an open access journal and the full, final, typeset and author-corrected version of record of the manuscript is available on our site with no access controls, subscription charges or pay-per-view fees (<http://bmjopen.bmj.com>).

If you have any questions on BMJ Open's open peer review process please email [info.bmjopen@bmj.com](mailto:info.bmjopen@bmj.com)

# BMJ Open

**The SCHIP study**  
**Sleep-Cognition-Hypothesis In maritime Pilots - The effect**  
**of long-term work-related poor sleep on cognition in**  
**healthy middle-aged men**  
**Methodology of a prospective cohort study in maritime**  
**pilots**

|                               |                                                                                                                                                                                                                                                                                                                                                                                                                                                                                                                                                                                                                                                                                            |
|-------------------------------|--------------------------------------------------------------------------------------------------------------------------------------------------------------------------------------------------------------------------------------------------------------------------------------------------------------------------------------------------------------------------------------------------------------------------------------------------------------------------------------------------------------------------------------------------------------------------------------------------------------------------------------------------------------------------------------------|
| Journal:                      | <i>BMJ Open</i>                                                                                                                                                                                                                                                                                                                                                                                                                                                                                                                                                                                                                                                                            |
| Manuscript ID                 | bmjopen-2018-026992                                                                                                                                                                                                                                                                                                                                                                                                                                                                                                                                                                                                                                                                        |
| Article Type:                 | Protocol                                                                                                                                                                                                                                                                                                                                                                                                                                                                                                                                                                                                                                                                                   |
| Date Submitted by the Author: | 01-Oct-2018                                                                                                                                                                                                                                                                                                                                                                                                                                                                                                                                                                                                                                                                                |
| Complete List of Authors:     | Thomas, Jana; Radboudumc, Geriatrics; Radboud Alzheimer Center Ooms, Sharon; Radboudumc, Geriatrics; Radboud Alzheimer Center Verbeek, Marcel; Radboudumc; Radboud Alzheimer Center Booi, Jan; Academic Medical Center, Department of Nuclear Medicine Rijpkema, Mark; Radboudumc, Radiology and nuclear medicine Kessels, Roy; Donders Institute for Brain, Cognition and Behaviour, Radboud university medical center, Medical Psychology; Vincent van Gogh Institute for Psychiatry Overeem, Sebastiaan; Eindhoven Univeristy of Technology, Eindhoven Medtech Innovation Center; Sleep Medicine Center Kempenhaeghe Claassen, Jurgen; Radboudumc, Geriatrics; Radboud Alzheimer Center |
| Keywords:                     | Alzheimer's disease, Amyloid accumulation, Neurodegeneration, Cognitive function, Sleep                                                                                                                                                                                                                                                                                                                                                                                                                                                                                                                                                                                                    |
|                               |                                                                                                                                                                                                                                                                                                                                                                                                                                                                                                                                                                                                                                                                                            |

SCHOLARONE™  
Manuscripts

### **The SCHIP study**

**Sleep-Cognition-Hypothesis In maritime Pilots** - The effect of long-term work-related poor sleep on cognition in healthy middle-aged men

*Methodology of a prospective cohort study in maritime pilots*

Jana Thomas, MSc<sup>\*1,2,3</sup>; Sharon Ooms, MSc<sup>\*1,2,3</sup>; Marcel M. Verbeek, PhD<sup>2,3,6</sup>; Jan Booij, MD, PhD<sup>7,8</sup>, Mark Rijpkema, PhD<sup>7</sup>; Roy P.C. Kessels, PhD<sup>2,3,9</sup>; Sebastiaan Overeem, MD, PhD<sup>4,5</sup> and Jurgen A.H.R. Claassen, MD, PhD<sup>1,2,3</sup>

(1) Department of Geriatric Medicine, Radboud University Medical Centre, Nijmegen, The Netherlands; (2) Radboudumc Alzheimer Centre, Nijmegen, The Netherlands; (3) Donders Institute for Brain, Cognition and Behavior, Nijmegen, The Netherlands; (4) Sleep Medicine Centre Kempenhaeghe, Heeze, The Netherlands; (5) Eindhoven Medtech Innovation Center, Eindhoven University of Technology, Eindhoven, The Netherlands; (6) Department of Neurology, Radboud University Medical Centre, Nijmegen, The Netherlands; (7) Department of Radiology and Nuclear Medicine, Radboud University Medical Center, Nijmegen, The Netherlands; (8) Department of Radiology and Nuclear Medicine, Amsterdam University Medical Center, Amsterdam, The Netherlands; (9) Department of Medical Psychology, Radboud University Medical Centre, Nijmegen, The Netherlands

*\*authors contributed equally to this work*

#### **Corresponding author:**

Jana Thomas

[Jana.thomas@radboudumc.nl](mailto:Jana.thomas@radboudumc.nl)

Reinier Postlaan 4

6526 GC Nijmegen

The Netherlands

**Wordcount:** 3.339 words (without abstract, figures, references)

## ABSTRACT

**Introduction:** Evidence indicates a bi-directional relationship between poor sleep and Alzheimer's disease (AD). While AD may lead to disruption of normal sleep, poor sleep in itself may play a causal role in the development of AD by influencing the production and/or clearance of the amyloid-beta (A $\beta$ ) protein. This led to the hypothesis that extended periods (>10 years) of disturbed sleep could lead to A $\beta$  accumulation with subsequent cognitive AD related decline.

**Objective:** To describe the methodology of the SCHIP study, a cohort study in maritime pilots that aims at investigating the relationship between chronic sleep disturbances due to an extrinsic cause (work related), cognitive function and amyloid accumulation among healthy middle-aged men to test the hypothesis that prolonged abnormal sleep behavior increases the risk of AD-related cognitive decline.

**Methods:** Our study sample consists of a group of healthy middle-aged maritime pilots, who have had irregular sleeping patterns for more than 15 years due to irregular work schedules. This chronic sleep deprivation group will be compared to a group of healthy, age and education matched controls with normal sleep. Participants will complete 10 days of actigraphy (Actiwatch 2, Philips Respironics) combined with a sleep-wake diary. They will undergo one night of polysomnography (PSG), followed by comprehensive assessment of cognitive function. Additionally, participants will undergo amyloid PET-CT (Positron Emission Tomography- Computed Tomography) to measure brain amyloid accumulation and MRI to investigate atrophy and vascular changes.

**Analysis:** All analyses will be performed using IBM SPSS version 20.0 (SPSS Inc, Chicago, USA). We will perform independent samples t-tests to compare all outcome parameters.

**Ethics and dissemination:** The study protocol was approved by our institutional ethical review board (NL55712.091.16, file number 2016-2337) and will be performed according to good clinical practice (GCP) rules. Data and results will be published in in 2019 and 2020.

**Key words:** Alzheimer's disease, amyloid accumulation, neurodegeneration, cognitive function, sleep, sleep deprivation, shift work

**ARTICLE SUMMARY**

## Strengths and limitations of the study

- the unique cohort of maritime pilots allows the prospective assessment of long-term externally caused sleep disturbances and their potential consequences for cognitive functioning and amyloid accumulation
- the unique cohort might also be a limitation to the study, because they might not be comparable to the control group to some extent
- in addition to imaging techniques (PET-CT and MRI), we use sensitive and well-validated neuropsychological tests to measure different domains of cognitive function (reaction time, visual memory, executive function, semantic memory and episodic memory)
- we will make use of four different instruments to get a comprehensive measure of sleeping patterns (two subjective and two objective ones)
- our results could give rise to new treatment opportunities, that aim at sleep improvement and management in order to prevent or reduce amyloid accumulation and in turn delay or even prevent the development of AD

## 1. INTRODUCTION

Alzheimer's disease (AD) is the most prevalent cause of dementia and currently affects approximately 36 million people worldwide (1). Thus far, no successful treatment is available. One of the major contributors to the neurodegeneration seen in the brains of AD patients is amyloid-beta ( $A\beta$ ) (2). The amyloid-cascade hypothesis characterizes amyloid accumulation as the fundamental initiating pathway for the development of AD (3). While memory impairment and disorientation are hallmarks of the disease, approximately 44% of people living with AD also suffer from some form of sleep disturbance (4). AD patients have more awakenings during the night, present decreased slow wave sleep (SWS), less rapid eye movement (REM) sleep and more frequent daytime napping compared to age-matched controls without dementia (4). Neurodegeneration in the sleep-wake regulating areas of the brain has been identified as a potential cause of the frequent sleep disturbances among AD patients (5).

Recent evidence suggests that sleep and AD have a bi-directional relationship, in which sleep disturbances are not just a symptom of AD, but also contribute to AD pathophysiology (6). Elderly people suffering from insomnia are more likely to develop AD compared to controls without insomnia (7). Furthermore, disrupted circadian rhythm among otherwise healthy individuals (8) and sleep-disordered breathing disorders (9) increase the chance of developing AD later in life. Poor sleep quality specifically has been shown to increase the risk of AD among older individuals (5, 10-13). A recent meta-analysis of epidemiological studies found that poor sleep increased AD risk with a relative risk (RR) of 1.7 and that approximately 15% of cases of AD in the population might be attributable to sleep problems (14).

The effect of acute sleep deprivation on AD has been shown in both rodent and human studies, that investigated the effect of sleep and sleep deprivation on  $A\beta$  levels. Rodents and humans show fluctuations in  $A\beta$  levels over a 24-hour rhythm, where levels rise during wakefulness and decrease during sleep (15, 16). Following acute sleep deprivation, the drop in  $A\beta$  levels that would normally occur after sufficient sleep the following morning, was absent. Based on this evidence, chronic sleep disturbances might lead to a pronounced accumulation of  $A\beta$  in the brain, which in turn increases the risk to develop AD.

1  
2  
3 To date, observational and epidemiological studies have identified a relationship between poor sleep  
4 and the risk of developing AD. Experimental research has found that sleep deprivation and A $\beta$  levels  
5 are related in both animals and humans. However, the direct effect of chronic sleep deprivation and its  
6 consequences on cognitive functioning, particularly the risk to develop AD later in life, has not been  
7 studied before.  
8  
9

10  
11  
12 In this article we describe the methodology and the participant cohort of the SCHIP (Sleep-Cognition  
13 Hypothesis In maritime Pilots) study. We designed the SCHIP study in order to investigate the effect  
14 of chronic sleep deprivation on cognitive function, structural brain changes, and amyloid accumulation  
15 by using a unique cohort of healthy subjects with long-term sleep disruption due to their occupation as  
16 maritime pilots. Because of the bi-directional nature of the relationship between sleep and AD, poor  
17 sleep and sleep disorders could represent an early symptom that precedes the clinical manifestation of  
18 AD. Therefore, it is especially important to investigate the effect of chronic sleep deprivation in a  
19 group that experiences disrupted sleep, which is caused by an external factor (work) and not by an  
20 intrinsic sleeping disorder (such as insomnia) which could be AD-related. Therefore participants in  
21 this study were selected based on their chronic sleep disruptions caused by objectifiable external  
22 occupational factors.  
23  
24  
25  
26  
27  
28  
29  
30  
31  
32  
33

34 Results and insights born from the SCHIP study could shed more light on sleep disturbance as one of  
35 the risk factors to develop AD and contribute to new and improved treatment strategies. In the SCHIP  
36 study we will investigate whether participants with chronic sleep disturbances perform worse on  
37 cognitive assessment in comparison to a healthy control group and whether chronic sleep disturbances  
38 are associated with elevated brain amyloid concentrations and structural brain changes.  
39  
40  
41  
42  
43  
44  
45

## 46 **2. METHODS AND ANALYSIS**

### 47 **2.1. Participants**

48  
49  
50 Considering that this study is a proof of principle study, it is not possible to establish the exact effect  
51 size of the change in cognitive function we expect to see between the maritime pilots and the healthy  
52  
53  
54  
55  
56  
57  
58  
59  
60

1  
2  
3 controls.

4 To account for possible 10% withdrawal, we chose to have n=20 participants in each arm.

5  
6 In order to reach enough power to detect clinically relevant differences regarding the results of the  
7 PET-CT scan, we performed a sample size power calculation using G Power (version 3.1.9.3) (17).

8  
9 Reported normal values (mean and standard deviation) for this age group in the literature vary between  
10 studies but are in the order of a mean standard uptake value (SUV) between 0.9 and 1.1 with standard  
11 deviations (SDs) in the range of 0.05 – 0.2. We define a relevant difference between maritime pilots  
12 and normal values to be 0.2 or more (an SUV of 1.3 or higher is considered as abnormal in most  
13 studies). This results in a large expected effect size (>0.8). The precise number of age- and education  
14 matched subjects in the database is not known yet but is estimated to be at least 50 (between 50 and  
15 100). We have applied a one-tailed test (it is not possible to have a SUV lower than normal values).  
16 With an alpha of 0.05, with n=20 our power is 0.95 or higher (depending on the number of normal  
17 subjects). The lower level for power (0.85) is reached with 13-15 pilots.

18  
19 Based on these calculations, we will aim to recruit 20 pilots, allowing for drop-out of 5-7 pilots (either  
20 due to withdrawal of consent or artefacts in the PET-CT).

21  
22 Participants will be recruited within the national organization of Dutch Maritime Pilots (Nederlandse  
23 Loodswezen). We selected the maritime pilots as a suitable study population because of their unique  
24 irregular working schedule. In a usual workweek they have a maximum of two hours of rest in  
25 between episodes of two hours (or more) of work, for a period of 24 hours. This rhythm continues, in  
26 most cases, for four or five consecutive days a week, followed by a week off. The week off is often  
27 characterized by limited sleep as well, because the maritime pilots use that week to catch up with  
28 social engagements (friends, family, etc.).

29  
30 The responsibility of a maritime pilot is to handle large international ships arriving by sea and to  
31 maneuver them into their final docking position in one of the Dutch harbors. This profession carries  
32 high responsibilities and requires accurate knowledge of the dimensions of the harbor and the ships  
33 besides technical knowledge and navigational skills. The 2-by-2-hour schedule is necessary because  
34 guiding the ships is a time intensive procedure, that can take hours to complete. Maintaining this work  
35 schedule for more than 15 years will result in prolonged exposure to sleep deprivation.



1  
2  
3 We will reach out to the whole maritime pilot community, in order to recruit pilots who are  
4 approximately 50 years old, with at least 15 years of uninterrupted work history as a maritime pilot.  
5 Additional inclusion criteria are not using neuro-active medications or psycho-stimulants,  
6 consumption of <14 alcoholic beverages per week, a body mass index of 18-30kg/m<sup>2</sup> and no  
7 subjective cognitive complaints (Cognitive Failure Questionnaire (CFQ <43). As control group, we  
8 will recruit 20 age, sex and education matched healthy adults with normal sleep indicated by a score of  
9 >5 on a subjective sleep questionnaire (Pittsburgh Sleep Quality Index, PSQI). The study protocol was  
10 approved by our institutional review board (NL55712.091.16, file number 2016-2337) and will be  
11 performed according to good clinical practice (GCP) rules.  
12  
13  
14  
15  
16  
17  
18  
19  
20  
21

## 22 **2.2. Experimental Design**

23  
24 The aim of the SCHIP study is to investigate the relationship between chronic sleep disturbances due  
25 to an extrinsic cause (work related), cognitive function and amyloid accumulation among healthy  
26 middle-aged men to test the hypothesis that prolonged abnormal sleep behavior increases the risk of  
27 AD-related cognitive decline. In order to test this hypothesis, maritime pilots will have three visits  
28 and controls will have two visits (figure 1). During the first visit participants will complete general  
29 questionnaires about medical history, sleeping habits and cognitive state. Approximately 10 days after  
30 the first visit has taken place, participants are invited to the sleep center Kempenhaeghe (Heeze, The  
31 Netherlands) for the second visit. They will arrive at the sleep center at 19.00 h and complete a  
32 memory consolidation test (modified 'Doors Test') and a test for attentional performance (TAP 2.3)  
33 (18), followed by overnight polysomnography (PSG). Participants wake up at their normal wake time  
34 and complete a neuropsychological assessment after breakfast around 9.00h.  
35  
36  
37  
38  
39  
40  
41  
42  
43  
44  
45

46 Visit three (only for the maritime pilots) will be performed at the Radboud university medical center in  
47 Nijmegen (The Netherlands), where participants will undergo a standard amyloid PET-CT to measure  
48 brain amyloid accumulation and a 3T-MRI for coregistration. Participants are scheduled in their week  
49 off in order to prevent short term effects of sleep disruption on amyloid concentrations in the brain  
50  
51  
52  
53  
54 (19).  
55  
56  
57  
58  
59  
60

Figure 1: Overview experimental design

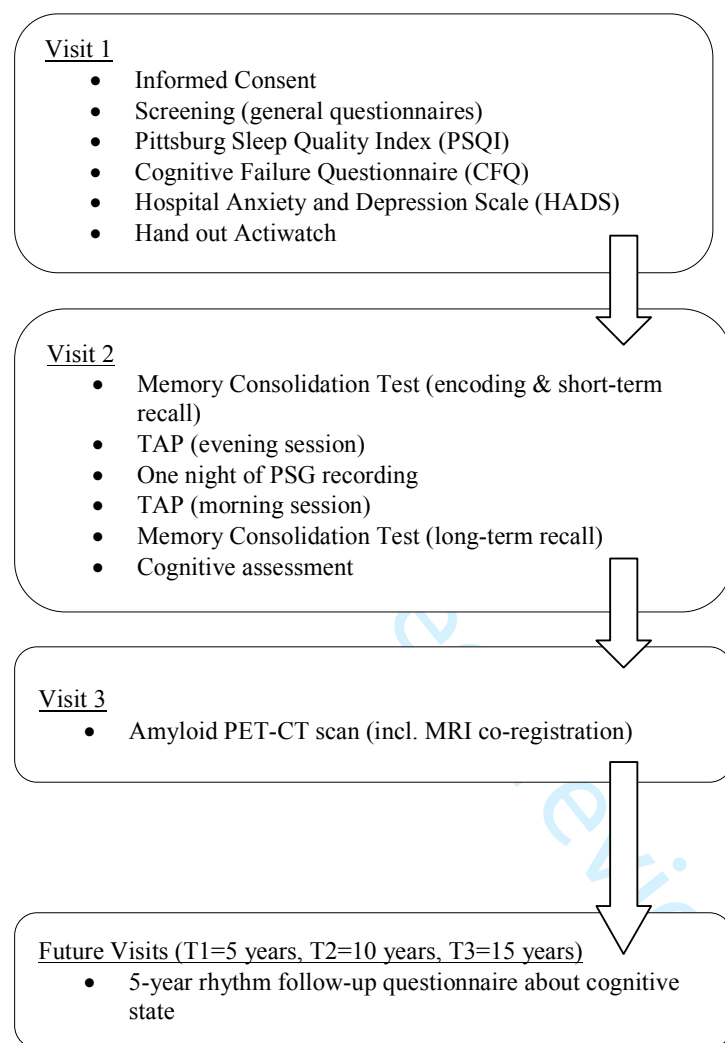

### 2.3. Sleep Measurements

In order to obtain a comprehensive measure of sleeping patterns, we will use the Pittsburg Sleep Quality Index (PSQI) with questions about average sleeping behavior, including the report of bedtime, get-up time, sleep latency, total sleep time, sleep disturbances (pain, breathing etc.) and use of sleep medication. The maritime pilots will be instructed to fill in the questionnaire twice, once with regard to a work week and once with regard to a week off. Additionally all participants are asked to maintain a sleep-wake diary on a daily basis. In this diary they have to keep track of their bed times, the time it took to fall asleep (sleep latency), the number of awakenings and their get up times. Furthermore they will receive an accelerometer, the Actiwatch 2 (Philips Respironics; Eindhoven, The Netherlands), in

1  
2  
3 order to obtain more objective measurements of sleeping behavior. The Actiwatch is worn around the  
4 wrist and measures sleep and wakefulness automatically based on movement. Participants are  
5 instructed to fill in the sleep diary and to wear the Actiwatch for 10 days preceding the second visit.  
6  
7  
8  
9

#### 10 **2.4. Cognitive assessment**

11  
12 The neuropsychological assessment has been designed to measure the following cognitive domains,  
13 using validated Dutch versions of widely used neuropsychological tests. Episodic memory is assessed  
14 using the WMS-IV Logical Memory and the Rey-Auditory Verbal Learning Test (RAVLT). Working  
15 memory and executive function are measured by WAIS-IV Digit Span, Trail Making Test (TMT-A,  
16 TMT-B) and WAIS-IV Digit Symbol test. Semantic memory and language are assessed by letter  
17 fluency (D-A-T), semantic fluency (animal/profession naming) and the Boston Naming Test-Short  
18 Form (BNT) (20). Attentional performance is studied using the alertness test of the Test of Attentional  
19 Performance (TAP 2.3) (18). This test is conducted twice, once in the evening around 19.00 h and  
20 once in the morning around 9.00 h. In order to test overnight memory consolidation, a novel paradigm  
21 was developed based on the Doors Test, a visual recognition task developed by Baddely and  
22 colleagues (21) and extended using a validated database of 2000 pictures of doors (22). During the  
23 encoding trial, we present 120 pictures of doors that participants are instructed to remember. All  
24 targets (doors) are presented twice in a different, pseudo-randomized order. Targets are shown for 5  
25 seconds each, separated by a fixation cross presented for 1 second. Approximately 10 minutes after the  
26 encoding trial, participants are presented with 30 of the original doors and 15 distracters (new pictures  
27 of doors, not presented before) that are randomly mixed. During this short-term recognition test, the  
28 task is to indicate whether the door had been presented before (oral response with 'yes') or not (oral  
29 response 'no'). For the long-term delayed recall, the same procedure is applied in the morning, using  
30 the other 90 original pictures, plus 45 new distracters. Calculating the hits and false alarms, we  
31 compute the sensitivity ( $A'$ ) for short-term and for long-term delayed recall ( $A' = 0.5 + ((\text{hit-rate} -$   
32  $\text{false alarm rate}) \times (1 + \text{hit rate} - \text{false alarm rate})) / (4 \times \text{hit rate} \times (1 - \text{false alarm rate}))$ ).  
33  
34  
35  
36  
37  
38  
39  
40  
41  
42  
43  
44  
45  
46  
47  
48  
49  
50  
51  
52  
53  
54  
55  
56  
57  
58  
59  
60

Figure 2: Memory Consolidation Task Design

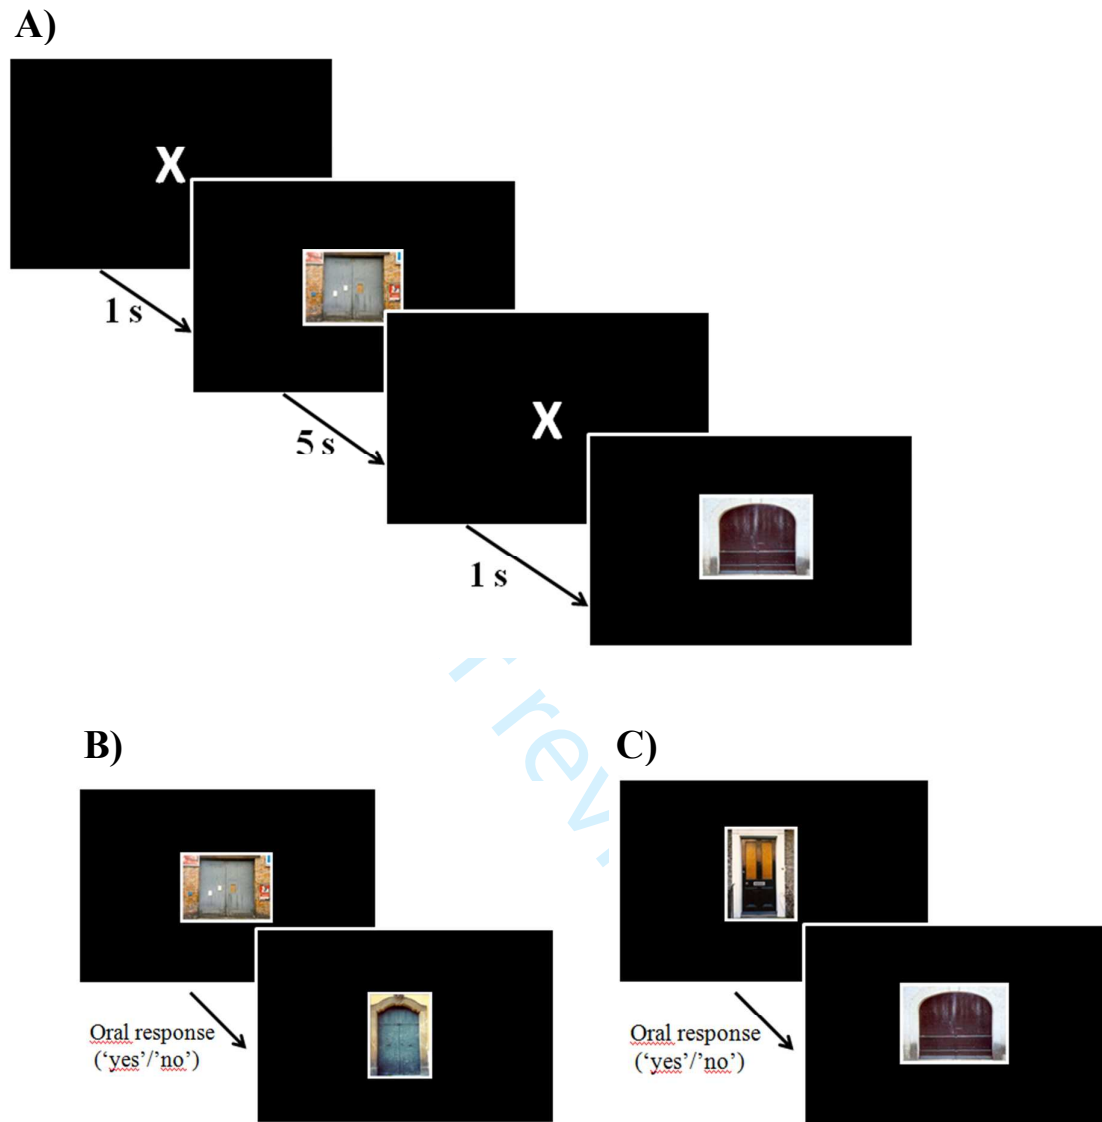

A) Example of Encoding trials – 120 doors separated by fixation cross, B) Example of short-term recognition trials (after approx. 10 min) – oral response (pressing spacebar to move to next stimulus), 30 targets and 15 distracters, C) Example of long-term recognition trials (after one night) - oral response (pressing spacebar to move to next stimulus), 90 targets and 45 distracters

### 2.5. Amyloid PET-CT scan with co-registered magnetic resonance imaging (MRI)

Brain amyloid PET-CT scan will be performed to measure amyloid load. Participants will be scanned at the Radboudumc department of Radiology and Nuclear medicine on a PET scanner (Biograph mCT, Siemens, Erlangen, Germany). Subjects will receive an intravenous bolus of the well-validated PET tracer  $^{18}\text{F}$ -flutemetamol, and static brain images will be acquired from 90-110 min post-injection

1  
2  
3 (frames of 5 mins), as recommended (see SPC;  
4 [http://www.ema.europa.eu/docs/en\\_GB/document\\_library/EPAR\\_-](http://www.ema.europa.eu/docs/en_GB/document_library/EPAR_-_Product_Information/human/002557/WC500172950.pdf)  
5 [\\_Product\\_Information/human/002557/WC500172950.pdf](http://www.ema.europa.eu/docs/en_GB/document_library/EPAR_-_Product_Information/human/002557/WC500172950.pdf)). The individual reconstructed PET images  
6  
7 will be co-registered with individual structural T<sub>1</sub> MRI scans.  
8  
9

10 The PET scans will be rated visually as positive or negative for the presence of amyloid depositions  
11 typical of AD, as earlier described (23). For quantitative purposes, grey matter volumes of interest will  
12 be defined on the individual MRIs (e.g. frontal brain areas, the precuneus, and hippocampus) as well  
13 as for cerebella grey matter (to assess non-specific uptake). The amyloid burden will be quantified  
14 using the standardized uptake value ratio, since it has been validated that this analysis method has  
15 comparable agreement with full kinetic modeling (24). Brain MRI will be performed on a 3 Tesla  
16 system (Magnetom Trio, Siemens, Erlangen, Germany). The structural T<sub>1</sub>-weighted images will be  
17 used for co-registration purposes, and to define grey matter in the volumes of interest. In addition,  
18 these scans will be used to perform volumetric measurements (e.g. of the hippocampus). Also, arterial  
19 spin labeling (ASL) will be performed to measure global and regional cerebral blood flow (CBF),  
20 since reduced regional CBF is an early marker of AD.  
21  
22  
23  
24  
25  
26  
27  
28  
29  
30  
31  
32  
33

## 34 **2.6. Future follow-up visits**

35 Because of the insufficient knowledge about the correlation between amyloid accumulation in the  
36 brain and the actual development of Alzheimer's disease, we decided to follow the maritime pilots in a  
37 5 year cycle in order to monitor any cognitive changes. We will contact them 3 times in total, which  
38 leaves us with a maximum follow-up period of 15 years. At each time point, they will be asked to  
39 answer 3 questions online:  
40  
41  
42  
43  
44

- 45 1) Did you develop cognitive complaints over the last 5 years?
- 46 2) Were you diagnosed with mild cognitive impairment during the last 5 years? If yes, when and what  
47 was the precise diagnosis?
- 48 3) Were you diagnosed with dementia in the past 5 years? If yes, when and what was the precise  
49 diagnosis?
- 50  
51  
52  
53  
54

55 If the answer is 'Yes' to one of these questions, we will reach out to the participants for clarification.  
56  
57  
58  
59  
60

## 2.7. Statistical analysis

All analyses will be performed using IBM SPSS version 20.0 (SPSS Inc, Chicago, USA). Statistical significance is set at  $p < 0.05$ , with Bonferroni correction for multiple comparisons when appropriate, combined with reports of effect size and 95% confidence intervals. All continuous variables will be assessed for normal distribution by inspection of histograms and the Kolmogorov-Smirnov test. Levene's test will be used to assess equality of variances. We will perform an independent samples t-test to compare all outcome parameters. The primary outcome for cognitive function will be the score on each test respectively adjusted for age and education. Regarding imaging, the primary outcome measure will be the visual read of the amyloid PET scans (positive or negative PET). Secondary outcome measurements will be quantitative PET (SUV ratios), brain volume (MRI), and CBF measurements (MRI-ASL).

## 3. ETHICS AND DISSEMINATION

The study protocol was approved by our institutional review board, CMO (Commissie Mensgebonden Onderzoek) (NL55712.091.16, file number 2016-2337) and performed according to good clinical practice (GCP) rules. Written informed consent will be obtained from all participants. We are planning to publish the data and results of the SCHIP study in two or three articles in 2019 and 2020.

## 4. DISCUSSION

In this article we presented the design and methodology of the SCHIP study. The main aim of the SCHIP study is to investigate the effect of chronic sleep deprivation on cognition and amyloid accumulation in a group of maritime pilots. Since previous studies assessed sleep disruption for only one or a few days, the SCHIP study extends these studies by investigating the effect of long term sleep disturbances on cognitive function and amyloid accumulation. We expect that the maritime pilots have had long-term (>10 years) exposure to fragmented sleep due to their work schedules and that this long-term poor sleep has led to reduction in SWS. Every slow wave observed on an electroencephalography (EEG) is a pause in synaptic activity (25). Synaptic activity and A $\beta$  levels appear

1  
2  
3 strongly related, as A $\beta$  levels increase due to synaptic activity (26). More synaptic activity is observed  
4 during wakefulness, especially in the default mode network (DMN) or other highly interconnected  
5 brain areas (26). During sleep, synaptic activity is reduced, which could result in a decrease in A $\beta$   
6 levels in the brain (26). Therefore, poor sleep (especially poor SWS) over the course of many years  
7 could increase A $\beta$  concentrations, which in turn could trigger AD-associated neurodegeneration and  
8 loss of cognitive function.  
9

10  
11 To test this hypothesis, we will perform extensive cognitive testing, using tests that are sensitive to  
12 subtle decline in episodic memory, which is affected early in AD. Additionally, amyloid positivity will  
13 be measured using amyloid PET-CT scans in order to explore the effect of long-term poor sleep on  
14 amyloid concentration in the brain. Cerebral blood flow and cerebrovascular resistance will be  
15 investigated, as reductions in blood flow and increases in resistance occur early in the Alzheimer  
16 disease process (27). Finally, global grey matter volume and hippocampal volume will be measured.  
17  
18 The unique cohort of maritime pilots will allow the prospective assessment of long-term sleep  
19 disturbances and its consequences for cognitive functioning and amyloid accumulation. The design of  
20 the SCHIP study presents a number of strengths. No other previous investigation has looked into the  
21 effect of chronic sleep disturbances on cognition in healthy men to this extent. Since sleep disorders  
22 might also be early symptoms of preclinical AD, it is especially important in this age group to  
23 investigate the effect of chronic sleep disruption due to an external factor and not due to intrinsic sleep  
24 disorders. Furthermore, we measure different domains of cognitive function (reaction time, visual  
25 memory, executive function, semantic memory and episodic memory) using sensitive and well-  
26 validated neuropsychological tasks. In addition to testing cognitive functions, we will perform brain  
27 imaging to detect amyloid accumulation as potential consequence of chronic sleep deprivation. We  
28 will make use of four different instruments to get a comprehensive measure of sleeping patterns, two  
29 subjective and two objective ones. The subjective measurements consist of the PSQI and the  
30 maintenance of the sleep-wake diary. The objective assessments include the data from the Actiwatch 2  
31 (Philips Respironics) in addition to a night of PSG. The data from the Actiwatch can be compared to  
32 the sleep-wake diary entries. These data can then be used to verify the sleeping behavior of  
33 participants, making sure they maintain regularity and consistency in their sleeping habits.  
34  
35  
36  
37  
38  
39  
40  
41  
42  
43  
44  
45  
46  
47  
48  
49  
50  
51  
52  
53  
54  
55  
56  
57  
58  
59  
60

1  
2  
3 Results of the SCHIP study will give us more insights into the consequences of long term disrupted  
4 sleep on cognitive function and amyloid accumulation in an AD related context. Our results could give  
5 rise to new treatment opportunities, that aim at sleep improvement and management in order to  
6 prevent or reduce amyloid accumulation and in turn delay or even prevent the development of AD.  
7  
8  
9

10  
11  
12  
13  
14  
15  
16  
17  
18  
19  
20  
21  
22  
23  
24  
25  
26  
27  
28  
29  
30  
31  
32  
33  
34  
35  
36  
37  
38  
39  
40  
41  
42  
43  
44  
45  
46  
47  
48  
49  
50  
51  
52  
53  
54  
55  
56  
57  
58  
59  
60

For peer review only



1  
2  
3 *Figure 1: Overview experimental design*  
4

5  
6 *Figure 2: Memory Consolidation Task Design*  
7

8 A) Example of Encoding trials – 120 doors separated by fixation cross, B) Example of short-term recognition trials (after  
9 approx. 10 min) – oral response (pressing spacebar to move to next stimulus), 30 targets and 15 distracters, C) Example of  
10 long-term recognition trials (after one night) - oral response (pressing spacebar to move to next stimulus), 90 targets and 45  
11 distracters  
12  
13  
14  
15  
16  
17  
18  
19  
20  
21  
22  
23  
24  
25  
26  
27  
28  
29  
30  
31  
32  
33  
34  
35  
36  
37  
38  
39  
40  
41  
42  
43  
44  
45  
46  
47  
48  
49  
50  
51  
52  
53  
54  
55  
56  
57  
58  
59  
60

## 5. REFERENCES

1. Prince M, Bryce R, Albanese E, Wimo A, Ribeiro W, Ferri CP. The global prevalence of dementia: a systematic review and metaanalysis. *Alzheimers Dement*. 2013;9(1):63-75. e2.
2. Jagust WJ, Mormino EC. Lifespan brain activity,  $\beta$ -amyloid, and Alzheimer's disease. *Trends Cogn Sci*. 2011;15(11):520-6.
3. Korczyn AD. The amyloid cascade hypothesis. *Alzheimers Dement*. 2008;4(3):176-8.
4. Vitiello MV, Borson S. Sleep disturbances in patients with Alzheimer's disease. *CNS Drugs*. 2001;15(10):777-96.
5. Ju Y-ES, McLeland JS, Toedebusch CD, Xiong C, Fagan AM, Duntley SP, et al. Sleep quality and preclinical Alzheimer disease. *JAMA neurology*. 2013;70(5):587-93.
6. Ju Y-ES, Lucey BP, Holtzman DM. Sleep and Alzheimer disease pathology [mdash] a bidirectional relationship. *Nature reviews Neurology*. 2014;10(2):115-9.
7. Osorio RS, Pirraglia E, Agüera-Ortiz LF, During EH, Sacks H, Ayappa I, et al. Greater risk of Alzheimer's disease in older adults with insomnia. *J Am Geriatr Soc*. 2011;59(3):559-62.
8. Tranah GJ, Blackwell T, Stone KL, Ancoli-Israel S, Paudel ML, Ensrud KE, et al. Circadian activity rhythms and risk of incident dementia and mild cognitive impairment in older women. *Ann Neurol*. 2011;70(5):722-32.
9. Yaffe K, Laffan AM, Harrison SL, Redline S, Spira AP, Ensrud KE, et al. Sleep-disordered breathing, hypoxia, and risk of mild cognitive impairment and dementia in older women. *Jama*. 2011;306(6):613-9.
10. Benedict C, Byberg L, Cedernaes J, Hogenkamp PS, Giedraitis V, Kilander L, et al. Self-reported sleep disturbance is associated with Alzheimer's disease risk in men. *Alzheimers Dement*. 2015;11(9):1090-7.
11. Sterniczuk R, Theou O, Rusak B, Rockwood K. Sleep disturbance is associated with incident dementia and mortality. *Curr Alzheimer Res*. 2013;10(7):767-75.
12. Hahn EA, Wang H-X, Andel R, Fratiglioni L. A change in sleep pattern may predict Alzheimer disease. *The American Journal of Geriatric Psychiatry*. 2014;22(11):1262-71.
13. Potvin O, Lorrain D, Forget H, Dube M, Grenier S, Preville M, et al. Sleep quality and 1-year incident cognitive impairment in community-dwelling older adults. *Sleep*. 2012;35(4):491-9.
14. Bubu OM, Brannick M, Mortimer J, Umasabor-Bubu O, Sebastião YV, Wen Y, et al. Sleep, cognitive impairment, and Alzheimer's disease: a systematic review and meta-analysis. *Sleep*. 2016;40(1):zsw032.
15. Kang J-E, Lim MM, Bateman RJ, Lee JJ, Smyth LP, Cirrito JR, et al. Amyloid- $\beta$  dynamics are regulated by orexin and the sleep-wake cycle. *Science (80- )*. 2009;326(5955):1005-7.
16. Ooms S, Overeem S, Besse K, Rikkert MO, Verbeek M, Claassen JA. Effect of 1 night of total sleep deprivation on cerebrospinal fluid  $\beta$ -amyloid 42 in healthy middle-aged men: a randomized clinical trial. *JAMA neurology*. 2014;71(8):971-7.
17. Faul F, Erdfelder E, Lang A-G, Buchner A. G\* Power 3: A flexible statistical power analysis program for the social, behavioral, and biomedical sciences. *Behav Res Methods*. 2007;39(2):175-91.
18. Zimmermann P, Fimm B. A test battery for attentional performance. *Applied neuropsychology of attention Theory, diagnosis and rehabilitation*. 2002:110-51.
19. Shokri-Kojori E, Wang G-J, Wiers CE, Demiral SB, Guo M, Kim SW, et al.  $\beta$ -Amyloid accumulation in the human brain after one night of sleep deprivation. *Proceedings of the National Academy of Sciences*. 2018;115(17):4483-8.
20. Bigler ED. Symptom validity testing, effort, and neuropsychological assessment. *J Int Neuropsychol Soc*. 2012;18(4):632-40.
21. Baddeley A, Emslie H, Nimmo-Smith I. *Doors and People: A Test of Visual and Verbal Recall and Recognition*, Thames Valley Test Company, Bury St. Edmunds, UK. 1994.
22. Baddeley AD, Hitch GJ, Quinlan PT, Bowes L, Stone R. Doors for memory: A searchable database. *The Quarterly Journal of Experimental Psychology*. 2016;69(11):2111-8.

- 1  
2  
3 23. Frings L, Hellwig S, Bormann T, Spehl TS, Buchert R, Meyer PT. Amyloid load but not regional  
4 glucose metabolism predicts conversion to Alzheimer's dementia in a memory clinic population. *Eur J*  
5 *Nucl Med Mol Imaging*. 2018;45(8):1442-8.
- 6 24. Cecchin D, Barthel H, Poggiali D, Cagnin A, Tiepolt S, Zucchetta P, et al. A new integrated dual  
7 time-point amyloid PET/MRI data analysis method. *Eur J Nucl Med Mol Imaging*. 2017;44(12):2060-  
8 72.
- 9 25. Nir Y, Staba RJ, Andrillon T, Vyazovskiy VV, Cirelli C, Fried I, et al. Regional slow waves and  
10 spindles in human sleep. *Neuron*. 2011;70(1):153-69.
- 11 26. Kang D, Lim HK, Jung WS, Jeong J-H, Kim TW, Han J-H, et al. Sleep and Alzheimer's Disease.  
12 *Sleep Medicine Research*. 2015;6(1):1-9.
- 13 27. de Heus RA, de Jong DL, Sanders ML, van Spijker GJ, Oudegeest-Sander MH, Hopman MT, et  
14 al. Dynamic regulation of cerebral blood flow in patients with Alzheimer disease. *Hypertension*.  
15 2018;72(1):139-50.
- 16  
17  
18  
19  
20  
21  
22  
23  
24  
25  
26  
27  
28  
29  
30  
31  
32  
33  
34  
35  
36  
37  
38  
39  
40  
41  
42  
43  
44  
45  
46  
47  
48  
49  
50  
51  
52  
53  
54  
55  
56  
57  
58  
59  
60

## 6. AUTHORS' CONTRIBUTION

Jana Thomas was involved in setting up the study, recruiting participants, gathering baseline characteristics, analyzing of first data and writing most of the sections in this manuscript.

Sharon Ooms helped with setting up the study, recruitment and design of the project and writing the manuscript.

Marcel Verbeek contributed to the design of the study.

Jan Booij and Mark Rijpkema were major contributors in choosing and designing the right PET-CT/MRI procedure and wrote part of the manuscript.

Roy Kessels contributed to selecting the right neuropsychological tests, helped with the statistical analyzes of the first data and contributed to the revision of this manuscript.

Sebastiaan Overeem was a major contributor in setting up a collaboration with the sleeping center Kempenhaeghe (Heeze, The Netherlands) and helped revising the manuscript.

Jurgen Claassen was a major contributor in obtaining funding, setting up the study, designing the project and was extensively involved in writing and revising the manuscript.

All authors read and approved the final manuscript.

## 7. FUNDING STATEMENT

The SCHIP study is funded by ISAO (Internationale Stichting Alzheimer Onderzoek) (grant number 15040). Additional financial resources were provided by the Radboud University Medical Center (Nijmegen, The Netherlands).

## 8. COMPETING INTEREST STATEMENT

The authors declare that they have no competing interest.

Figure 1: Overview experimental design

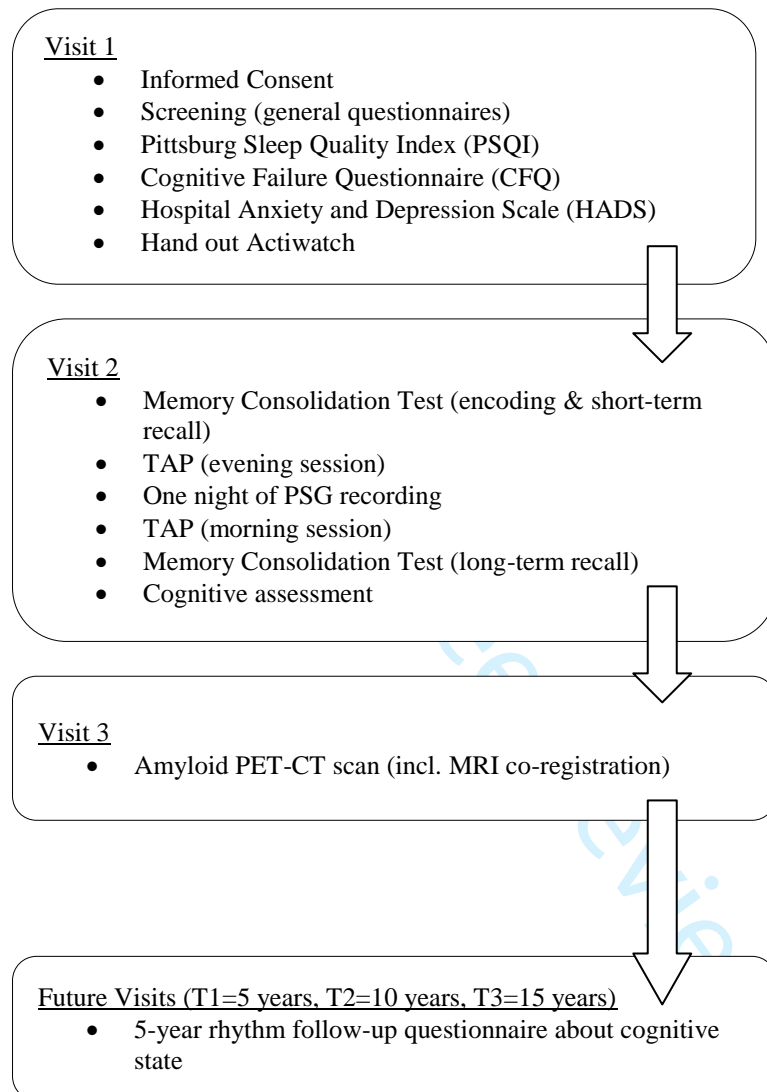

Figure 2: Memory Consolidation Task Design

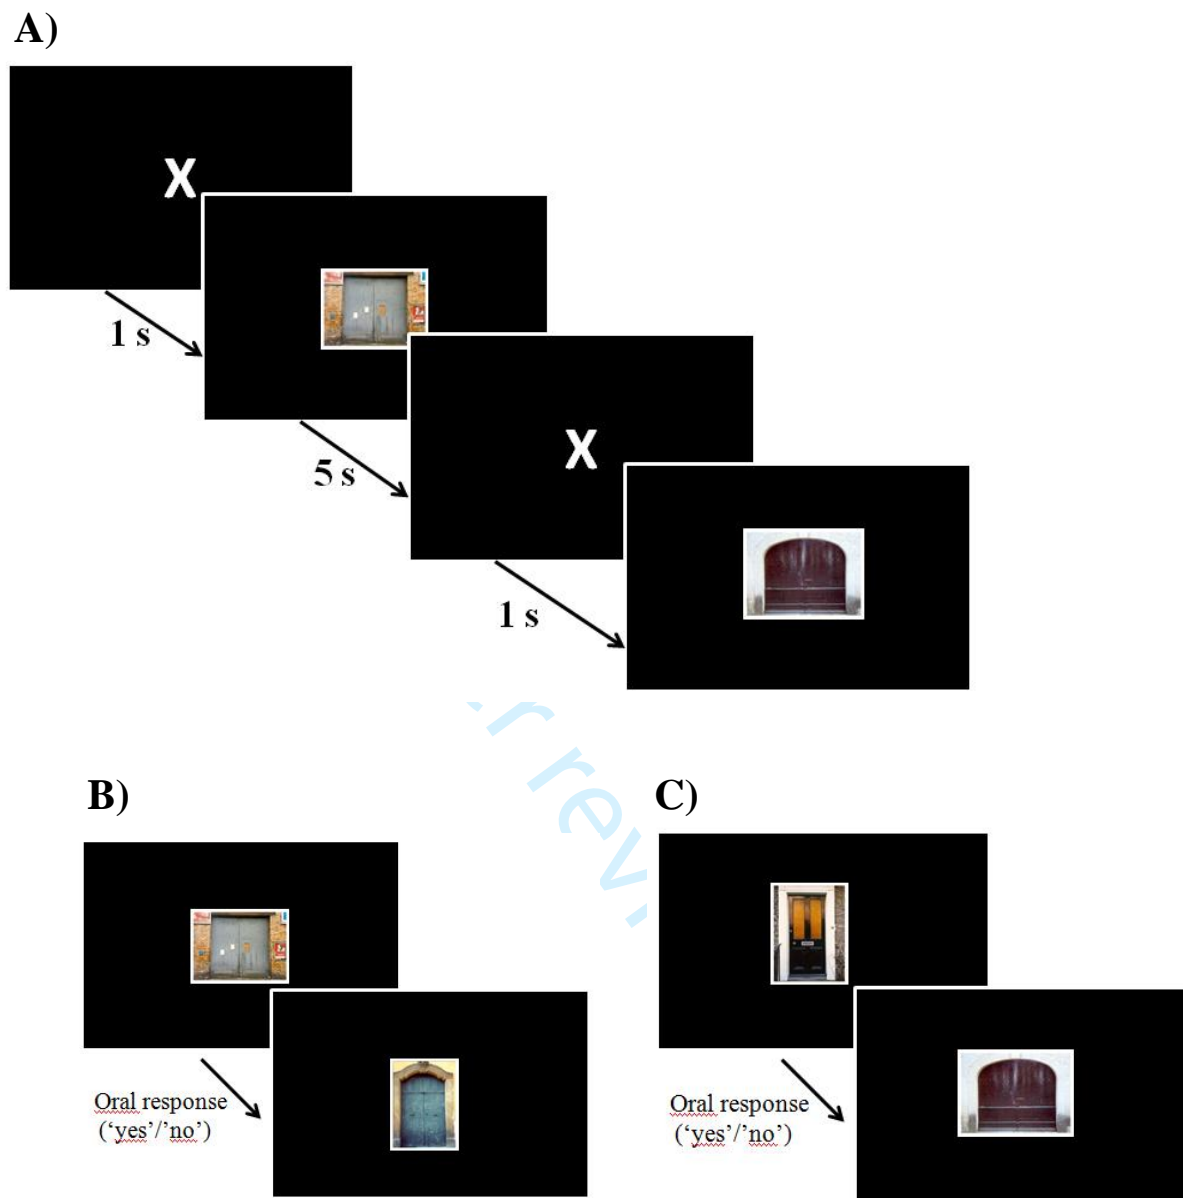

A) Example of Encoding trials – 120 doors separated by fixation cross, B) Example of short-term recognition trials (after approx. 10 min) – oral response (pressing spacebar to move to next stimulus), 30 targets and 15 distracters, C) Example of long-term recognition trials (after one night) - oral response (pressing spacebar to move to next stimulus), 90 targets and 45 distracters

# BMJ Open

## Sleep-Cognition-Hypothesis In maritime Pilots - What is the effect of long-term work-related poor sleep on cognition and amyloid accumulation in healthy middle-aged maritime pilots: Methodology of a case-control study

|                                 |                                                                                                                                                                                                                                                                                                                                                                                                                                                                                                                                                                                                                                                                                            |
|---------------------------------|--------------------------------------------------------------------------------------------------------------------------------------------------------------------------------------------------------------------------------------------------------------------------------------------------------------------------------------------------------------------------------------------------------------------------------------------------------------------------------------------------------------------------------------------------------------------------------------------------------------------------------------------------------------------------------------------|
| Journal:                        | <i>BMJ Open</i>                                                                                                                                                                                                                                                                                                                                                                                                                                                                                                                                                                                                                                                                            |
| Manuscript ID                   | bmjopen-2018-026992.R1                                                                                                                                                                                                                                                                                                                                                                                                                                                                                                                                                                                                                                                                     |
| Article Type:                   | Protocol                                                                                                                                                                                                                                                                                                                                                                                                                                                                                                                                                                                                                                                                                   |
| Date Submitted by the Author:   | 10-Apr-2019                                                                                                                                                                                                                                                                                                                                                                                                                                                                                                                                                                                                                                                                                |
| Complete List of Authors:       | Thomas, Jana; Radboudumc, Geriatrics; Radboud Alzheimer Center Ooms, Sharon; Radboudumc, Geriatrics; Radboud Alzheimer Center Verbeek, Marcel; Radboudumc; Radboud Alzheimer Center Booi, Jan; Academic Medical Center, Department of Nuclear Medicine Rijpkema, Mark; Radboudumc, Radiology and nuclear medicine Kessels, Roy; Donders Institute for Brain, Cognition and Behaviour, Radboud university medical center, Medical Psychology; Vincent van Gogh Institute for Psychiatry Overeem, Sebastiaan; Eindhoven Univeristy of Technology, Eindhoven Medtech Innovation Center; Sleep Medicine Center Kempenhaeghe Claassen, Jurgen; Radboudumc, Geriatrics; Radboud Alzheimer Center |
| <b>Primary Subject Heading</b>: | Geriatric medicine                                                                                                                                                                                                                                                                                                                                                                                                                                                                                                                                                                                                                                                                         |
| Secondary Subject Heading:      | Neurology, Radiology and imaging, Public health                                                                                                                                                                                                                                                                                                                                                                                                                                                                                                                                                                                                                                            |
| Keywords:                       | Alzheimer's disease, Amyloid accumulation, Neurodegeneration, Cognitive function, Sleep                                                                                                                                                                                                                                                                                                                                                                                                                                                                                                                                                                                                    |
|                                 |                                                                                                                                                                                                                                                                                                                                                                                                                                                                                                                                                                                                                                                                                            |

SCHOLARONE™  
Manuscripts

1  
2  
3 Sleep-Cognition-Hypothesis In maritime Pilots – What is the effect of long-term work-related poor  
4 sleep on cognition and amyloid accumulation in healthy middle-aged maritime pilots: Methodology of  
5 a case-control study  
6  
7  
8  
9

10  
11 Jana Thomas, MSc\*<sup>1,2,3</sup>; Sharon Ooms, MSc\*<sup>1,2,3</sup>; Marcel M. Verbeek, PhD<sup>2,3,6</sup>; Jan Booij, MD, PhD<sup>7,8</sup>,  
12 Mark Rijpkema, PhD<sup>7</sup>; Roy P.C. Kessels, PhD<sup>2,3,9</sup>; Sebastiaan Overeem, MD, PhD<sup>4,5</sup> and Jurgen  
13 A.H.R. Claassen, MD, PhD<sup>1,2,3</sup>  
14  
15  
16

17 (1) Department of Geriatric Medicine, Radboud University Medical Centre, Nijmegen, The  
18 Netherlands; (2) Radboudumc Alzheimer Centre, Nijmegen, The Netherlands; (3) Donders Institute  
19 for Brain, Cognition and Behavior, Nijmegen, The Netherlands; (4) Sleep Medicine Centre  
20 Kempenhaeghe, Heeze, The Netherlands; (5) Eindhoven Medtech Innovation Center, Eindhoven  
21 University of Technology, Eindhoven, The Netherlands; (6) Department of Neurology, Radboud  
22 University Medical Centre, Nijmegen, The Netherlands; (7) Department of Radiology and Nuclear  
23 Medicine, Radboud University Medical Center, Nijmegen, The Netherlands; (8) Department of  
24 Radiology and Nuclear Medicine, Amsterdam University Medical Center, Amsterdam, The  
25 Netherlands; (9) Department of Medical Psychology, Radboud University Medical Centre, Nijmegen,  
26 The Netherlands  
27  
28  
29  
30  
31  
32  
33

34 *\*authors contributed equally to this work*  
35  
36  
37

38 Corresponding author:

39 Jana Thomas

40 [Jana.thomas@radboudumc.nl](mailto:Jana.thomas@radboudumc.nl)

41 Reinier Postlaan 4

42 6526 GC Nijmegen

43 The Netherlands  
44  
45  
46  
47  
48

49 Word count: 3.539 words (without abstract, figures, references)  
50  
51  
52  
53  
54  
55  
56  
57  
58  
59  
60



## ABSTRACT

**Introduction:** Evidence indicates a bi-directional relationship between poor sleep and Alzheimer's disease (AD). While AD may lead to disruption of normal sleep, poor sleep in itself may play a causal role in the development of AD by influencing the production and/or clearance of the amyloid-beta ( $A\beta$ ) protein. This led to the hypothesis that extended periods (>10 years) of partial sleep deprivation could lead to  $A\beta$  accumulation with subsequent cognitive AD related decline. This manuscript describes the methodology of the SCHIP study, a cohort study in maritime pilots that aims at investigating the relationship between chronic partial sleep deprivation due to an extrinsic cause (work related), cognitive function and amyloid accumulation among healthy middle-aged maritime pilots, to test the hypothesis that prolonged partial sleep deprivation increases the risk of AD-related cognitive decline.

**Methods:** Our study sample consists of a group of healthy middle-aged maritime pilots ( $n=20$ ), who have had irregular sleeping patterns for more than 15 years due to irregular work schedules. This chronic partial sleep deprivation group will be compared to a group of healthy, age and education matched controls ( $n=20$ ) with normal sleep. Participants will complete 10 days of actigraphy (Actiwatch 2, Philips Respironics) combined with a sleep-wake diary. They will undergo one night of polysomnography (PSG), followed by comprehensive assessment of cognitive function. Additionally, participants will undergo amyloid PET-CT (Positron Emission Tomography- Computed Tomography) to measure brain amyloid accumulation and MRI to investigate atrophy and vascular changes.

**Analysis:** All analyses will be performed using IBM SPSS version 20.0 (SPSS Inc, Chicago, USA). We will perform independent samples t-tests to compare all outcome parameters.

**Ethics and dissemination:** The study protocol was approved by our institutional ethical review board (NL55712.091.16, file number 2016-2337) and will be performed according to good clinical practice (GCP) rules. Data and results will be published in 2020.

**Key words:** Alzheimer's disease, amyloid accumulation, neurodegeneration, cognitive function, sleep, sleep deprivation, shift work

## ARTICLE SUMMARY

### Strengths and limitations of the study

- the unique cohort of maritime pilots allows the prospective assessment of long-term externally caused partial sleep deprivation and their potential consequences for cognitive functioning and amyloid accumulation
- the unique cohort might also be a limitation to the study, because they might not be comparable to the control group to some extent (e.g. IQ, work environment, personality)
- in addition to imaging techniques (PET-CT and MRI), we use sensitive and well-validated neuropsychological tests to measure different domains of cognitive function (reaction time, visual memory, executive function, semantic memory and episodic memory)
- we will make use of four different instruments to get a comprehensive measure of sleeping patterns (two subjective and two objective ones)
- our results could give rise to new treatment opportunities, that aim at sleep improvement and management in order to prevent or reduce amyloid accumulation and in turn delay or even prevent the development of AD

## 1. INTRODUCTION

Alzheimer's disease (AD) is the most prevalent cause of dementia and currently affects approximately 36 million people worldwide (1). Thus far, no successful treatment is available. One of the major contributors to the neurodegeneration seen in the brains of AD patients is amyloid-beta ( $A\beta$ ) (2). The amyloid-cascade hypothesis characterizes amyloid accumulation as the fundamental initiating pathway for the development of AD (3). The reason why amyloid accumulates however is not clear yet. Recent evidence suggests that poor sleep might be one of the risk factors for amyloid accumulation and thereby increases the risk of AD development (4). Elderly people suffering from insomnia are more likely to develop AD compared to controls without insomnia (4). Furthermore, disrupted circadian rhythm among otherwise healthy individuals (5) and sleep-disordered breathing disorders (6) increase the chance of developing AD later in life. Poor sleep quality specifically has been shown to increase the risk of AD among older individuals (7-11). A recent meta-analysis of epidemiological studies found that poor sleep increased AD risk and that approximately 15% of cases of AD in the population might be attributable to sleep problems (12).

The effect of acute sleep deprivation on AD has been shown in both rodent and human studies, that investigated the effect of sleep and sleep deprivation on  $A\beta$  levels. Rodents and humans show fluctuations in  $A\beta$  levels over a 24-hour rhythm, where levels rise during wakefulness and decrease during sleep (13, 14). Following acute sleep deprivation, the drop in  $A\beta$  levels that would normally occur after sufficient sleep the following morning, was absent. Based on this evidence, chronic sleep disturbances might lead to a pronounced accumulation of  $A\beta$  in the brain, which in turn increases the risk to develop AD.

To date, observational and epidemiological studies have identified a relationship between poor sleep and the risk of developing AD. Experimental research has found that sleep deprivation and  $A\beta$  levels are related in both animals and humans. However, the direct effect of chronic partial sleep deprivation and its consequences on cognitive functioning, particularly the risk to develop AD later in life, has not been studied before.

In this article we describe the methodology and the participant cohort of the SCHIP (Sleep-Cognition Hypothesis In maritime Pilots) study. We designed the SCHIP study in order to investigate the effect

1  
2  
3 of chronic partial sleep deprivation on cognitive function, structural brain changes, and amyloid  
4 accumulation by using a unique cohort of healthy subjects with long-term partial sleep deprivation due  
5 to their occupation as maritime pilots. Because of the bi-directional nature of the relationship between  
6 sleep and AD, in which poor sleep is a symptom of the disease that precedes the clinical manifestation  
7 of AD, but might also be a risk factor that potentially contributes to the development of the disease, it  
8 is especially important to investigate the effect of chronic sleep deprivation in a group that experiences  
9 disrupted sleep, which is caused by an external factor (work) and not by an intrinsic sleeping disorder  
10 (such as insomnia) which could be AD-related. Therefore participants in this study were selected  
11 based on their chronic partial sleep deprivation caused by objectifiable external occupational factors  
12 Results and insights born from the SCHIP study could shed more light on sleep disturbance as one of  
13 the risk factors to develop AD and contribute to new and improved treatment strategies. In the SCHIP  
14 study we will investigate whether participants with chronic partial sleep deprivation perform worse on  
15 cognitive assessment in comparison to a healthy control group and whether chronic partial sleep  
16 deprivation is associated with elevated brain amyloid concentrations and structural brain changes.  
17  
18  
19  
20  
21  
22  
23  
24  
25  
26  
27  
28  
29  
30  
31  
32  
33  
34

## 35 **2. METHODS AND ANALYSIS**

### 36 **2.1. Participants**

37  
38 Considering that this study is a proof of principle study, it is not possible to establish the exact effect  
39 size of the change in cognitive function we expect to see between the maritime pilots and the healthy  
40 controls.  
41  
42  
43  
44  
45

46 To account for possible 10% withdrawal, we chose to have  $n=20$  participants in each arm.

47  
48 In order to reach enough power to detect clinically relevant differences regarding the results of the  
49 PET-CT scan, we performed a sample size power calculation using G Power (version 3.1.9.3) (15).  
50 Reported normal values (mean and standard deviation) for this age group in the literature vary between  
51 studies but are in the order of a mean standard uptake value (SUV) between 0.9 and 1.1 with standard  
52 deviations (SDs) in the range of 0.05 – 0.2. We define a relevant difference between maritime pilots  
53 and normal values to be 0.2 or more (an SUV of 1.3 or higher is considered as abnormal in most  
54  
55  
56  
57  
58  
59  
60

1  
2  
3 studies). This results in a large expected effect size ( $>0.8$ ). The precise number of age- and education  
4 matched subjects in the database is not known yet but is estimated to be at least 50 (between 50 and  
5 100). We have applied a one-tailed test (it is not possible to have a SUV lower than normal values).  
6  
7  
8  
9 With an alpha of 0.05, with  $n=20$  our power is 0.95 or higher (depending on the number of normal  
10 subjects). The lower level for power (0.85) is reached with 13-15 pilots.

11  
12  
13 Based on these calculations, we will aim to recruit 20 pilots, allowing for drop-out of 5-7 pilots (either  
14 due to withdrawal of consent or artefacts in the PET-CT).

15  
16  
17 Participants will be recruited within the national organization of Dutch Maritime Pilots (Nederlandse  
18 Loodswezen). We selected the maritime pilots as a suitable study population because of their unique  
19 irregular working schedule. They are called to work depending on the number and kind of ships that  
20 arrive. In a typical 7-day work week they have to be available 24 hours per day during which they can  
21 be called several times. This results in multiple divided short sleep periods over 24 hours during a  
22 work week, this is followed by a week off.

23  
24  
25 The responsibility of a maritime pilot is to handle large international ships arriving by sea and to  
26 maneuver them into their final docking position in one of the Dutch harbors. This profession carries  
27 high responsibilities and requires accurate knowledge of the dimensions of the harbor and the ships  
28 besides technical knowledge and navigational skills. This results in irregular working schedules  
29 because guiding the ships is a time intensive procedure, that can take hours to complete. Maintaining  
30 this schedule for more than 15 years will result in prolonged exposure to sleep deprivation.

31  
32  
33 We will reach out to the whole maritime pilot community, in order to recruit pilots who are  
34 approximately 50 to 60 years old, with at least 15 years of uninterrupted work history as a maritime  
35 pilot.

36  
37  
38 Additional inclusion criteria are not using neuro-active medications or psycho-stimulants,  
39 consumption of  $<14$  alcoholic beverages per week, a body mass index of 18-30kg/m<sup>2</sup> and no  
40 subjective cognitive complaints (Cognitive Failure Questionnaire (CFQ  $<43$ ). As control group, we  
41 will recruit 20 age, sex and education matched healthy adults with normal sleep indicated by a score of  
42  $>5$  on a subjective sleep questionnaire (Pittsburgh Sleep Quality Index, PSQI). The study protocol was  
43 approved by our institutional review board (NL55712.091.16, file number 2016-2337) and will be  
44  
45  
46  
47  
48  
49  
50  
51  
52  
53  
54  
55  
56  
57  
58  
59  
60

1  
2  
3 performed according to good clinical practice (GCP) rules. Inclusion of participants started in August  
4  
5 2018 and we expect to complete the analysis of all data in August 2020.  
6  
7  
8

## 9 **2.2. Experimental Design**

10  
11 The aim of the SCHIP study is to investigate the relationship between chronic partial sleep deprivation  
12  
13 due to an extrinsic cause (work related), cognitive function and amyloid accumulation among healthy  
14  
15 middle-aged men to test the hypothesis that prolonged partial sleep deprivation increases the risk of  
16  
17 AD-related cognitive decline. In order to test this hypothesis, maritime pilots will have three visits  
18  
19 and controls will have two visits (figure 1). During the first visit participants will complete general  
20  
21 questionnaires about medical history, sleeping habits and cognitive state. Approximately 10 days after  
22  
23 the first visit has taken place, participants are invited to the sleep center Kempenhaeghe (Heeze, The  
24  
25 Netherlands) for the second visit. They will arrive at the sleep center at 19.00 h and complete a  
26  
27 memory consolidation test (modified 'Doors Test') and a test for attentional performance (TAP 2.3)  
28  
29 (16), followed by overnight polysomnography (PSG). Participants wake up at their normal wake time  
30  
31 and complete a neuropsychological assessment after breakfast around 9.00h.  
32  
33  
34

35 Visit three (only for the maritime pilots) will be performed at the Radboud university medical center in  
36  
37 Nijmegen (The Netherlands), where participants will undergo a standard amyloid PET-CT to measure  
38  
39 brain amyloid accumulation and a 3T-MRI for coregistration. Participants are scheduled in their week  
40  
41 off in order to prevent short term effects of sleep disruption on amyloid concentrations in the brain  
42  
43 (17). They are instructed not eat or drink anything except from water 3 hours prior to the scan.  
44  
45

46 *Figure 1: Overview experimental design*  
47

## 48 **2.3 Patient and Public Involvement**

49  
50 No patients were involved in this study because this study involves healthy participants.

51  
52 However, the participants' organization contacted us due to recent evidence from the literature on the  
53  
54 relationship between sleep and AD. They expressed their worries about their health and their own risk  
55  
56 of developing AD considering their irregular sleep. They reported feeling very tired at the end of a  
57  
58  
59  
60

1  
2  
3 work week and speculated that within their group of maritime pilots (including already retired pilots),  
4 cases of dementia occurred more frequently than expected.  
5

6  
7 Participants were also tightly involved in the design, realization and feasibility of the study. For  
8  
9 example, they were involved in choosing the technique to measure amyloid and expressed the  
10  
11 preference for a PET-CT scan over cerebrospinal fluid (CSF) measurements of amyloid.  
12

#### 13 Dissemination of results to participants:

14  
15 Results from the PSG measurements will be reported only to participants if we find abnormalities such  
16  
17 as apnea or sleeping disorders. This will be done by one of our sleep clinicians via telephone. Results  
18  
19 from the PET-CT scan will be disclosed via telephone by one of our clinicians as well. This is  
20  
21 according to the protocol that has been approved by the local ethical committee. Any incidental  
22  
23 findings on the PET-CT and/or MRI will be disseminated as well.  
24  
25  
26  
27

#### 28 **2.4. Sleep Measurements**

29  
30 In order to obtain a comprehensive measure of sleeping patterns, we will use the Pittsburg Sleep  
31  
32 Quality Index (PSQI) with questions about average sleeping behavior, including the report of bedtime,  
33  
34 get-up time, sleep latency, total sleep time, sleep disturbances (pain, breathing etc.) and use of sleep  
35  
36 medication. The maritime pilots will be instructed to fill in the questionnaire twice, once with regard  
37  
38 to a work week and once with regard to a week off. Additionally all participants are asked to maintain  
39  
40 a sleep-wake diary on a daily basis. In this diary they have to keep track of their bed times, the time it  
41  
42 took to fall asleep (sleep latency), the number of awakenings and their get up times. Furthermore they  
43  
44 will receive an accelerometer, the Actiwatch 2 (Philips Respironics; Eindhoven, The Netherlands), in  
45  
46 order to obtain more objective measurements of sleeping behavior. The Actiwatch is worn around the  
47  
48 wrist and measures total sleep time and number of awakenings during sleep automatically based on  
49  
50 movement. Participants are instructed to fill in the sleep diary and to wear the Actiwatch for 10 days  
51  
52 preceding the second visit.  
53  
54  
55  
56  
57  
58  
59  
60

## 2.5. Cognitive assessment

The neuropsychological assessment has been designed to measure the following cognitive domains, using validated Dutch versions of widely used neuropsychological tests. Episodic memory is assessed using the WMS-IV Logical Memory and the Rey-Auditory Verbal Learning Test (RAVLT). Working memory and executive function are measured by WAIS-IV Digit Span, Trail Making Test (TMT-A, TMT-B) and WAIS-IV Digit Symbol test. Semantic memory and language are assessed by letter fluency (D-A-T), semantic fluency (animal/profession naming) and the Boston Naming Test-Short Form (BNT) (18). Attentional performance is studied using the alertness test of the Test of Attentional Performance (TAP 2.3) (16). This test is conducted twice, once in the evening around 19.00 h and once in the morning around 9.00 h. In order to test overnight memory consolidation, a novel paradigm was developed based on the Doors Test, a visual recognition task developed by Baddely and colleagues (19) and extended using a validated database of 2000 pictures of doors (20). During the encoding trial, we present 120 pictures of doors that participants are instructed to remember. All targets (doors) are presented twice in a different, pseudo-randomized order. Targets are shown for 5 seconds each, separated by a fixation cross presented for 1 second (figure 2). Approximately 10 minutes after the encoding trial, participants are presented with 30 of the original doors and 15 distracters (new pictures of doors, not presented before) that are randomly mixed. During this short-term recognition test, the task is to indicate whether the door had been presented before (oral response with 'yes') or not (oral response 'no'). For the long-term delayed recall, the same procedure is applied in the morning, using the other 90 original pictures, plus 45 new distracters (figure 2). Calculating the hits and false alarms, we compute the sensitivity ( $A'$ ) for short-term and for long-term delayed recall ( $A' = 0.5 + ((\text{hit-rate} - \text{false alarm rate}) \times (1 + \text{hit rate} - \text{false alarm rate})) / (4 \times \text{hit rate} \times (1 - \text{false alarm rate}))$ ).

### *Figure 2: Memory Consolidation Task Design*

A) Example of Encoding trials – 120 doors separated by fixation cross, B) Example of short-term recognition trials (after approx. 10 min) – oral response (pressing spacebar to move to next stimulus), 30 targets and 15 distracters, C) Example of long-term recognition trials (after one night) - oral response (pressing spacebar to move to next stimulus), 90 targets and 45 distracters



## 2.6. Amyloid PET-CT scan with co-registered magnetic resonance imaging (MRI)

Brain amyloid PET-CT scan will be performed to measure amyloid load. Participants will be scanned at the Radboudumc department of Radiology and Nuclear medicine on a PET scanner (Biograph mCT, Siemens, Erlangen, Germany). Subjects will receive an intravenous bolus of the well-validated PET tracer  $^{18}\text{F}$ -flutemetamol, and static brain images will be acquired from 90-110 min post-injection (frames of 5 mins), as recommended (see SPC; [http://www.ema.europa.eu/docs/en\\_GB/document\\_library/EPAR\\_-\\_Product\\_Information/human/002557/WC500172950.pdf](http://www.ema.europa.eu/docs/en_GB/document_library/EPAR_-_Product_Information/human/002557/WC500172950.pdf)). The individual reconstructed PET images will be co-registered with individual structural  $T_1$  MRI scans.

The PET scans will be rated visually as positive or negative by an experienced nuclear medicine physician for the presence of amyloid depositions typical of AD. Scores will be expressed as a global SUV, which will be compared against population normative values, as earlier described (21). For quantitative purposes, grey matter volumes of interest will be defined on the individual MRIs (e.g. frontal brain areas, the precuneus, and hippocampus) as well as for cerebella grey matter (to assess non-specific uptake). The amyloid burden will be quantified using the standardized uptake value ratio, since it has been validated that this analysis method has comparable agreement with full kinetic modeling (22). Brain MRI will be performed on a 3 Tesla system (Magnetom Trio, Siemens, Erlangen, Germany). The structural  $T_1$ -weighted images will be used for co-registration purposes, and to define grey matter in the volumes of interest. In addition, these scans will be used to perform volumetric measurements (e.g. of the hippocampus). Also, arterial spin labeling (ASL) will be performed to measure global and regional cerebral blood flow (CBF), since reduced regional CBF is an early marker of AD. Individual anatomic MRI scans will be co-registered with the individual PET scans using the image processing platform FSL ([fsl.fmrib.ox.ac.uk](http://fsl.fmrib.ox.ac.uk)) to calculate standard uptake value ratios. The PET-CT data will be expressed in Centiloid units to evaluate our data with historical control data as was recently validated by Battle and co-workers (23).

## 2.7. Future follow-up visits

Because of the insufficient knowledge about the correlation between amyloid accumulation in the brain and the actual development of Alzheimer's disease, we decided to follow the maritime pilots in a 5 year cycle in order to monitor any cognitive changes. We will contact them 3 times in total, which leaves us with a maximum follow-up period of 15 years. At each time point, they will be asked to answer 3 questions online:

- 1) Did you develop cognitive complaints over the last 5 years? This question will be further elaborated on with the Cognitive Failure Questionnaire (CFQ). The CFQ is a validated questionnaire that aims at detecting daily disruptions of cognitive functions. Participants are confronted with 25 statements and have to indicate how often they experience the situation that is described in the statements with a score between 0 (never) and 4 (very often).
- 2) Were you diagnosed with mild cognitive impairment during the last 5 years? If yes, when and what was the precise diagnosis?
- 3) Were you diagnosed with dementia in the past 5 years? If yes, when and what was the precise diagnosis?

If the answer is 'Yes' to one of these questions, we will reach out to the participants for clarification.

## 2.8. Statistical analysis

All analyses will be performed using IBM SPSS version 20.0 (SPSS Inc, Chicago, USA). Statistical significance is set at  $p < 0.05$ , with Bonferroni correction for multiple comparisons when appropriate, combined with reports of effect size and 95% confidence intervals. All continuous variables will be assessed for normal distribution by inspection of histograms and the Kolmogorov-Smirnov test.

Levene's test will be used to assess equality of variances. We will perform an independent samples t-test to compare all outcome parameters. The primary outcome for cognitive function will be the score on each test respectively adjusted for age and education. Regarding imaging, the primary outcome measure will be the visual read of the amyloid PET scans (positive or negative PET). Secondary outcome measurements will be quantitative PET (SUV ratios), brain volume (MRI), and CBF measurements (MRI-ASL).

### 3. ETHICS AND DISSEMINATION

The study protocol was approved by our institutional review board, CMO (Commissie Mensgebonden Onderzoek) (NL55712.091.16, file number 2016-2337) and performed according to good clinical practice (GCP) rules. Written informed consent will be obtained from all participants. We are planning to publish the data and results of the SCHIP study in two or three articles in 2019 and 2020.

### 4. DISCUSSION

In this article we presented the design and methodology of the SCHIP study. The main aim of the SCHIP study is to investigate the effect of chronic partial sleep deprivation on cognition and amyloid accumulation in a group of maritime pilots. Since previous studies assessed sleep deprivation for only one or a few days, the SCHIP study extends these studies by investigating the effect of long term partial sleep deprivation on cognitive function and amyloid accumulation. We expect that the maritime pilots have had long-term (>10 years) exposure to fragmented sleep due to their work schedules and that this long-term partial sleep deprivation has led to reduction in SWS. Every slow wave observed on an electro-encephalography (EEG) is a pause in synaptic activity (24). Synaptic activity and A $\beta$  levels appear strongly related, as A $\beta$  levels increase due to synaptic activity (25). More synaptic activity is observed during wakefulness, especially in the default mode network (DMN) or other highly interconnected brain areas (25). During sleep, synaptic activity is reduced, which could result in a decrease in A $\beta$  levels in the brain (25). Therefore, partial sleep deprivation (especially poor SWS) over the course of many years could increase A $\beta$  concentrations, which in turn could trigger AD-associated neurodegeneration and loss of cognitive function.

To test this hypothesis, we will perform extensive cognitive testing, using tests that are sensitive to subtle decline in episodic memory, which is affected early in AD. Additionally, amyloid positivity will be measured using amyloid PET-CT scans in order to explore the effect of long-term partial sleep deprivation on amyloid concentration in the brain. Cerebral blood flow and cerebrovascular resistance will be investigated, as reductions in blood flow and increases in resistance occur early in the

1  
2  
3 Alzheimer disease process (26). Finally, global grey matter volume and hippocampal volume will be  
4  
5 measured.

6  
7 The unique cohort of maritime pilots will allow the prospective assessment of long-term partial sleep  
8  
9 deprivation and its consequences for cognitive functioning and amyloid accumulation. The design of  
10  
11 the SCHIP study presents a number of strengths. No other previous investigation has looked into the  
12  
13 effect of chronic partial sleep deprivation on cognition in healthy men to this extent. Since sleep  
14  
15 disorders might also be early symptoms of preclinical AD, it is especially important in this age group  
16  
17 to investigate the effect of chronic sleep disruption due to an external factor and not due to intrinsic  
18  
19 sleep disorders. All enrolled maritime pilots did not have any sleeping disorders and did not use sleep  
20  
21 medication as confirmed by a general health questionnaire which was filled in upon screening for  
22  
23 participation. Furthermore, we measure different domains of cognitive function (reaction time, visual  
24  
25 memory, executive function, semantic memory and episodic memory) using sensitive and well-  
26  
27 validated neuropsychological tasks. In addition to testing cognitive functions, we will perform brain  
28  
29 imaging to detect amyloid accumulation as potential consequence of chronic sleep deprivation. We  
30  
31 will make use of four different instruments to get a comprehensive measure of sleeping patterns, two  
32  
33 subjective and two objective ones. The subjective measurements consist of the PSQI and the  
34  
35 maintenance of the sleep-wake diary. The objective assessments include the data from the Actiwatch 2  
36  
37 (Philips Respironics) in addition to a night of PSG. The data from the Actiwatch can be compared to  
38  
39 the sleep-wake diary entries. These data can then be used to verify the sleeping behavior of  
40  
41 participants, making sure they maintain regularity and consistency in their sleeping habits.

42  
43  
44 Results of the SCHIP study will give us more insights into the consequences of long term disrupted  
45  
46 sleep on cognitive function and amyloid accumulation in an AD related context. Our results could give  
47  
48 rise to new treatment opportunities, that aim at sleep improvement and management in order to  
49  
50 prevent or reduce amyloid accumulation and in turn delay or even prevent the development of AD.  
51  
52  
53  
54  
55  
56  
57  
58  
59  
60

## 5. REFERENCES

1. Prince M, Bryce R, Albanese E, Wimo A, Ribeiro W, Ferri CP. The global prevalence of dementia: a systematic review and metaanalysis. *Alzheimers Dement*. 2013;9(1):63-75. e2.
2. Jagust WJ, Mormino EC. Lifespan brain activity,  $\beta$ -amyloid, and Alzheimer's disease. *Trends Cogn Sci*. 2011;15(11):520-6.
3. Korczyn AD. The amyloid cascade hypothesis. *Alzheimers Dement*. 2008;4(3):176-8.
4. Osorio RS, Pirraglia E, Agüera-Ortiz LF, During EH, Sacks H, Ayappa I, et al. Greater risk of Alzheimer's disease in older adults with insomnia. *J Am Geriatr Soc*. 2011;59(3):559-62.
5. Tranah GJ, Blackwell T, Stone KL, Ancoli-Israel S, Paudel ML, Ensrud KE, et al. Circadian activity rhythms and risk of incident dementia and mild cognitive impairment in older women. *Ann Neurol*. 2011;70(5):722-32.
6. Yaffe K, Laffan AM, Harrison SL, Redline S, Spira AP, Ensrud KE, et al. Sleep-disordered breathing, hypoxia, and risk of mild cognitive impairment and dementia in older women. *Jama*. 2011;306(6):613-9.
7. Benedict C, Byberg L, Cedernaes J, Hogenkamp PS, Giedratis V, Kilander L, et al. Self-reported sleep disturbance is associated with Alzheimer's disease risk in men. *Alzheimers Dement*. 2015;11(9):1090-7.
8. Sterniczuk R, Theou O, Rusak B, Rockwood K. Sleep disturbance is associated with incident dementia and mortality. *Curr Alzheimer Res*. 2013;10(7):767-75.
9. Hahn EA, Wang H-X, Andel R, Fratiglioni L. A change in sleep pattern may predict Alzheimer disease. *The American Journal of Geriatric Psychiatry*. 2014;22(11):1262-71.
10. Potvin O, Lorrain D, Forget H, Dube M, Grenier S, Preville M, et al. Sleep quality and 1-year incident cognitive impairment in community-dwelling older adults. *Sleep*. 2012;35(4):491-9.
11. Ju Y-ES, McLeland JS, Toedebusch CD, Xiong C, Fagan AM, Duntley SP, et al. Sleep quality and preclinical Alzheimer disease. *JAMA neurology*. 2013;70(5):587-93.
12. Bubu OM, Brannick M, Mortimer J, Umasabor-Bubu O, Sebastião YV, Wen Y, et al. Sleep, cognitive impairment, and Alzheimer's disease: a systematic review and meta-analysis. *Sleep*. 2016;40(1):zsw032.
13. Kang J-E, Lim MM, Bateman RJ, Lee JJ, Smyth LP, Cirrito JR, et al. Amyloid- $\beta$  dynamics are regulated by orexin and the sleep-wake cycle. *Science* (80- ). 2009;326(5955):1005-7.
14. Ooms S, Overeem S, Besse K, Rikkert MO, Verbeek M, Claassen JA. Effect of 1 night of total sleep deprivation on cerebrospinal fluid  $\beta$ -amyloid 42 in healthy middle-aged men: a randomized clinical trial. *JAMA neurology*. 2014;71(8):971-7.
15. Faul F, Erdfelder E, Lang A-G, Buchner A. G\* Power 3: A flexible statistical power analysis program for the social, behavioral, and biomedical sciences. *Behav Res Methods*. 2007;39(2):175-91.
16. Zimmermann P, Fimm B. A test battery for attentional performance. *Applied neuropsychology of attention Theory, diagnosis and rehabilitation*. 2002:110-51.
17. Shokri-Kojori E, Wang G-J, Wiers CE, Demiral SB, Guo M, Kim SW, et al.  $\beta$ -Amyloid accumulation in the human brain after one night of sleep deprivation. *Proceedings of the National Academy of Sciences*. 2018;115(17):4483-8.
18. Bigler ED. Symptom validity testing, effort, and neuropsychological assessment. *J Int Neuropsychol Soc*. 2012;18(4):632-40.
19. Baddeley A, Emslie H, Nimmo-Smith I. *Doors and People: A Test of Visual and Verbal Recall and Recognition*, Thames Valley Test Company, Bury St. Edmunds, UK. 1994.
20. Baddeley AD, Hitch GJ, Quinlan PT, Bowes L, Stone R. Doors for memory: A searchable database. *The Quarterly Journal of Experimental Psychology*. 2016;69(11):2111-8.
21. Frings L, Hellwig S, Bormann T, Spehl TS, Buchert R, Meyer PT. Amyloid load but not regional glucose metabolism predicts conversion to Alzheimer's dementia in a memory clinic population. *Eur J Nucl Med Mol Imaging*. 2018;45(8):1442-8.

- 1  
2  
3 22. Cecchin D, Barthel H, Poggiali D, Cagnin A, Tiepolt S, Zucchetta P, et al. A new integrated dual  
4 time-point amyloid PET/MRI data analysis method. *Eur J Nucl Med Mol Imaging*. 2017;44(12):2060-  
5 72.  
6 23. Battle MR, Pillay LC, Lowe VJ, Knopman D, Kemp B, Rowe CC, et al. Centiloid scaling for  
7 quantification of brain amyloid with [18 F] flutemetamol using multiple processing methods. *EJNMMI*  
8 *Res*. 2018;8(1):107.  
9 24. Nir Y, Staba RJ, Andrillon T, Vyazovskiy VV, Cirelli C, Fried I, et al. Regional slow waves and  
10 spindles in human sleep. *Neuron*. 2011;70(1):153-69.  
11 25. Kang D, Lim HK, Jung WS, Jeong J-H, Kim TW, Han J-H, et al. Sleep and Alzheimer's Disease.  
12 *Sleep Medicine Research*. 2015;6(1):1-9.  
13 26. de Heus RA, de Jong DL, Sanders ML, van Spijker GJ, Oudegeest-Sander MH, Hopman MT, et  
14 al. Dynamic regulation of cerebral blood flow in patients with Alzheimer disease. *Hypertension*.  
15 2018;72(1):139-50.  
16  
17  
18  
19  
20  
21  
22  
23  
24  
25  
26  
27  
28  
29  
30  
31  
32  
33  
34  
35  
36  
37  
38  
39  
40  
41  
42  
43  
44  
45  
46  
47  
48  
49  
50  
51  
52  
53  
54  
55  
56  
57  
58  
59  
60

For peer review only

## 6. AUTHORS' CONTRIBUTION

Jana Thomas was involved in setting up the study, recruiting participants, gathering baseline characteristics, analyzing of first data and writing most of the sections in this manuscript.

Sharon Ooms helped with setting up the study, recruitment and design of the project and writing the manuscript.

Marcel Verbeek contributed to the design of the study.

Jan Booij and Mark Rijpkema were major contributors in choosing and designing the right PET-CT/MRI procedure and wrote part of the manuscript.

Roy Kessels contributed to selecting the right neuropsychological tests, helped with the statistical analyzes of the first data and contributed to the revision of this manuscript.

Sebastiaan Overeem was a major contributor in setting up a collaboration with the sleeping center Kempenhaeghe (Heeze, The Netherlands) and helped revising the manuscript.

Jurgen Claassen was a major contributor in obtaining funding, setting up the study, designing the project and was extensively involved in writing and revising the manuscript.

All authors read and approved the final manuscript.

## 7. FUNDING STATEMENT

The SCHIP study is funded by ISAO (Internationale Stichting Alzheimer Onderzoek) (grant number 15040). Additional financial resources were provided by the Radboud University Medical Center (Nijmegen, The Netherlands).

## 8. COMPETING INTEREST STATEMENT

The authors declare that they have no competing interest.

Figure 1: Overview experimental design

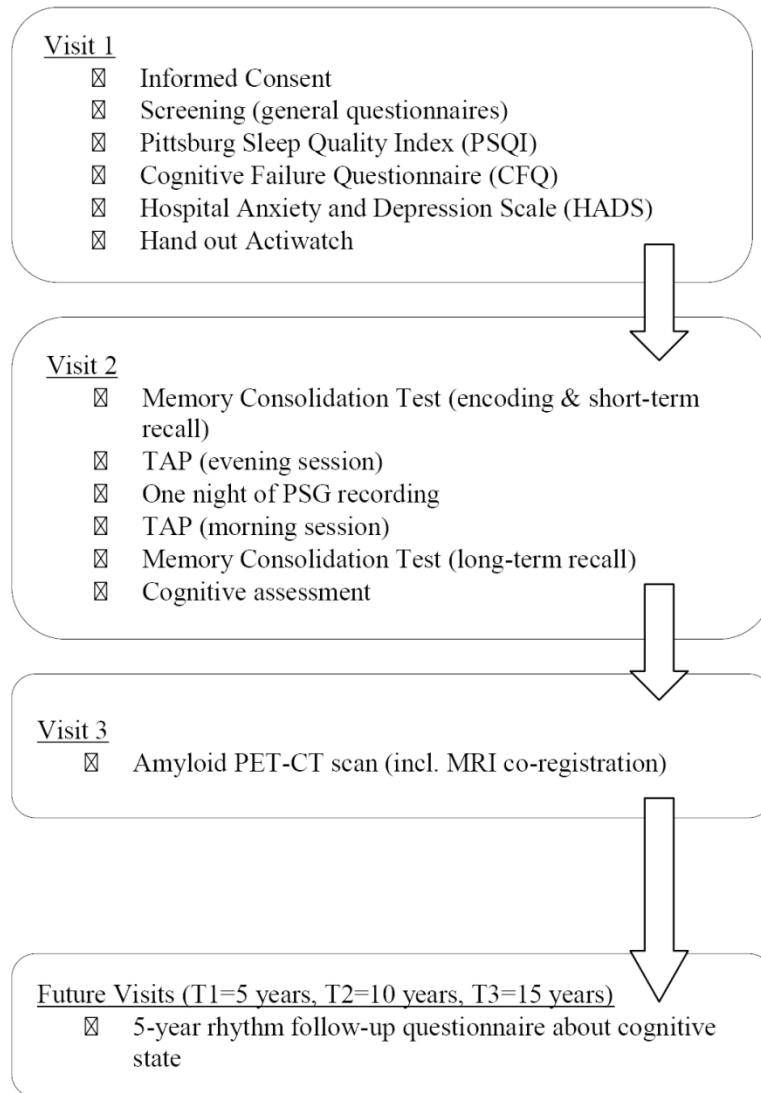

Figure 1: Overview experimental design

90x140mm (300 x 300 DPI)



Figure 2: Memory Consolidation Task Design

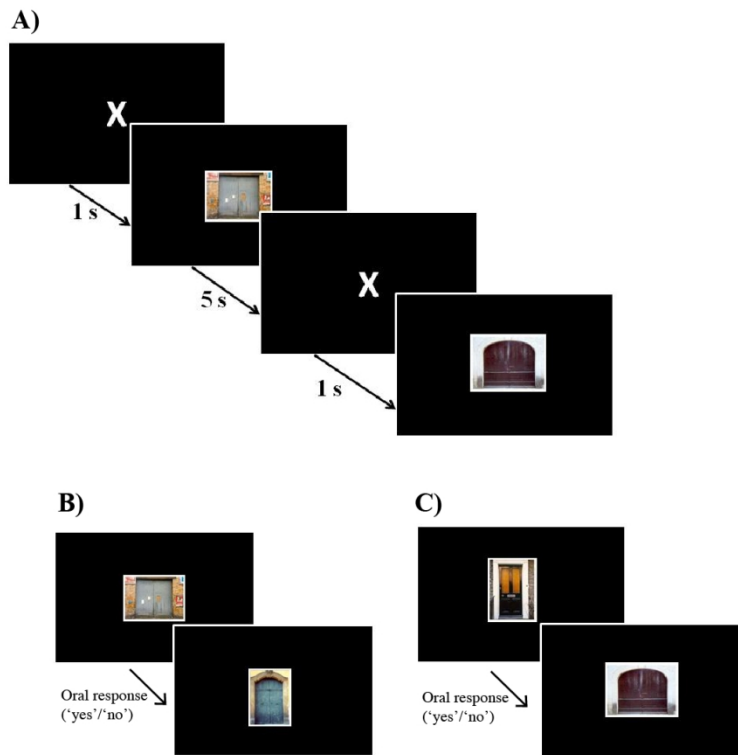

A) Example of Encoding trials – 120 doors separated by fixation cross, B) Example of short-term recognition trials (after approx. 10 min) – oral response (pressing spacebar to move to next stimulus), 30 targets and 15 distracters, C) Example of long-term recognition trials (after one night) - oral response (pressing spacebar to move to next stimulus), 90 targets and 45 distracters

Figure 2: Memory Consolidation Task Design

A) Example of Encoding trials – 120 doors separated by fixation cross, B) Example of short-term recognition trials (after approx. 10 min) – oral response (pressing spacebar to move to next stimulus), 30 targets and 15 distracters, C) Example of long-term recognition trials (after one night) - oral response (pressing spacebar to move to next stimulus), 90 targets and 45 distracters

120x119mm (300 x 300 DPI)

# BMJ Open

## Sleep-Cognition-Hypothesis In maritime Pilots - What is the effect of long-term work-related poor sleep on cognition and amyloid accumulation in healthy middle-aged maritime pilots: Methodology of a case-control study

|                                 |                                                                                                                                                                                                                                                                                                                                                                                                                                                                                                                                                                                                                                                                                            |
|---------------------------------|--------------------------------------------------------------------------------------------------------------------------------------------------------------------------------------------------------------------------------------------------------------------------------------------------------------------------------------------------------------------------------------------------------------------------------------------------------------------------------------------------------------------------------------------------------------------------------------------------------------------------------------------------------------------------------------------|
| Journal:                        | <i>BMJ Open</i>                                                                                                                                                                                                                                                                                                                                                                                                                                                                                                                                                                                                                                                                            |
| Manuscript ID                   | bmjopen-2018-026992.R2                                                                                                                                                                                                                                                                                                                                                                                                                                                                                                                                                                                                                                                                     |
| Article Type:                   | Protocol                                                                                                                                                                                                                                                                                                                                                                                                                                                                                                                                                                                                                                                                                   |
| Date Submitted by the Author:   | 21-May-2019                                                                                                                                                                                                                                                                                                                                                                                                                                                                                                                                                                                                                                                                                |
| Complete List of Authors:       | Thomas, Jana; Radboudumc, Geriatrics; Radboud Alzheimer Center Ooms, Sharon; Radboudumc, Geriatrics; Radboud Alzheimer Center Verbeek, Marcel; Radboudumc; Radboud Alzheimer Center Booi, Jan; Academic Medical Center, Department of Nuclear Medicine Rijpkema, Mark; Radboudumc, Radiology and nuclear medicine Kessels, Roy; Donders Institute for Brain, Cognition and Behaviour, Radboud university medical center, Medical Psychology; Vincent van Gogh Institute for Psychiatry Overeem, Sebastiaan; Eindhoven Univeristy of Technology, Eindhoven Medtech Innovation Center; Sleep Medicine Center Kempenhaeghe Claassen, Jurgen; Radboudumc, Geriatrics; Radboud Alzheimer Center |
| <b>Primary Subject Heading</b>: | Geriatric medicine                                                                                                                                                                                                                                                                                                                                                                                                                                                                                                                                                                                                                                                                         |
| Secondary Subject Heading:      | Neurology, Radiology and imaging, Public health                                                                                                                                                                                                                                                                                                                                                                                                                                                                                                                                                                                                                                            |
| Keywords:                       | Alzheimer's disease, Amyloid accumulation, Neurodegeneration, Cognitive function, Sleep                                                                                                                                                                                                                                                                                                                                                                                                                                                                                                                                                                                                    |
|                                 |                                                                                                                                                                                                                                                                                                                                                                                                                                                                                                                                                                                                                                                                                            |

SCHOLARONE™  
Manuscripts

1  
2  
3 Sleep-Cognition-Hypothesis In maritime Pilots – What is the effect of long-term work-related poor  
4 sleep on cognition and amyloid accumulation in healthy middle-aged maritime pilots: Methodology of  
5 a case-control study  
6  
7  
8  
9

10  
11 Jana Thomas, MSc<sup>1,2,3</sup>; Sharon Ooms, PhD<sup>1,2,3</sup>; Marcel M. Verbeek, PhD<sup>2,3,6</sup>; Jan Booij, MD, PhD<sup>7,8</sup>,  
12 Mark Rijpkema, PhD<sup>7</sup>; Roy P.C. Kessels, PhD<sup>2,3,9</sup>; Sebastiaan Overeem, MD, PhD<sup>4,5</sup> and Jurgen  
13 A.H.R. Claassen, MD, PhD<sup>1,2,3</sup>  
14  
15  
16

17 (1) Department of Geriatric Medicine, Radboud University Medical Centre, Nijmegen, The  
18 Netherlands; (2) Radboudumc Alzheimer Centre, Nijmegen, The Netherlands; (3) Donders Institute  
19 for Brain, Cognition and Behavior, Nijmegen, The Netherlands; (4) Sleep Medicine Centre  
20 Kempenhaeghe, Heeze, The Netherlands; (5) Eindhoven Medtech Innovation Center, Eindhoven  
21 University of Technology, Eindhoven, The Netherlands; (6) Department of Neurology, Radboud  
22 University Medical Centre, Nijmegen, The Netherlands; (7) Department of Radiology and Nuclear  
23 Medicine, Radboud University Medical Center, Nijmegen, The Netherlands; (8) Department of  
24 Radiology and Nuclear Medicine, Amsterdam University Medical Center, Amsterdam, The  
25 Netherlands; (9) Department of Medical Psychology, Radboud University Medical Centre, Nijmegen,  
26 The Netherlands  
27  
28  
29  
30  
31  
32  
33  
34  
35  
36  
37  
38  
39

40 Corresponding author:

41 Jana Thomas

42 [Jana.thomas@radboudumc.nl](mailto:Jana.thomas@radboudumc.nl)

43 Reinier Postlaan 4

44 6526 GC Nijmegen

45 The Netherlands  
46  
47  
48

49 Word count: 3.793 words (without abstract, figures, references)  
50  
51  
52  
53  
54  
55  
56  
57  
58  
59  
60

## ABSTRACT

**Introduction:** Evidence indicates a bi-directional relationship between poor sleep and Alzheimer's disease (AD). While AD may lead to disruption of normal sleep, poor sleep in itself may play a causal role in the development of AD by influencing the production and/or clearance of the amyloid-beta ( $A\beta$ ) protein. This led to the hypothesis that extended periods (>10 years) of sleep loss could lead to  $A\beta$  accumulation with subsequent cognitive AD related decline. This manuscript describes the methodology of the SCHIP study, a cohort study in maritime pilots that aims at investigating the relationship between prolonged work-related sleep loss, cognitive function and amyloid accumulation among healthy middle-aged maritime pilots, to test the hypothesis that prolonged sleep loss deprivation increases the risk of AD-related cognitive decline.

**Methods:** Our study sample consists of a group of healthy middle-aged maritime pilots (n=20), who have been exposed to highly irregular work schedules for more than 15 years. The maritime pilots will be compared to a group of healthy, age and education matched controls (n=20) with normal sleep. Participants will complete 10 days of actigraphy (Actiwatch 2, Philips Respironics) combined with a sleep-wake diary. They will undergo one night of polysomnography (PSG), followed by comprehensive assessment of cognitive function. Additionally, participants will undergo amyloid PET-CT (Positron Emission Tomography- Computed Tomography) to measure brain amyloid accumulation and MRI to investigate atrophy and vascular changes.

**Analysis:** All analyses will be performed using IBM SPSS version 20.0 (SPSS Inc, Chicago, USA). We will perform independent samples t-tests to compare all outcome parameters.

**Ethics and dissemination:** The study protocol was approved by our institutional ethical review board (NL55712.091.16, file number 2016-2337) and will be performed according to good clinical practice (GCP) rules. Data and results will be published in 2020.

**Key words:** Alzheimer's disease, amyloid accumulation, neurodegeneration, cognitive function, sleep, sleep deprivation, shift work

## ARTICLE SUMMARY

### Strengths and limitations of the study

- the unique cohort of maritime pilots allows the prospective assessment of the effect of chronic exposure to irregular maritime work schedules on cognitive functioning and amyloid accumulation; the unique cohort might also be a limitation to the study, because they might not be comparable to the control group to some extent (e.g. IQ, work environment, personality)
- since we include participants up to 60 years old we will have to take possible aging effects on sleep in to account while interpreting our results
- in addition to imaging techniques (PET-CT and MRI), we use sensitive and well-validated neuropsychological tests to measure different domains of cognitive function (reaction time, visual memory, executive function, semantic memory and episodic memory)
- we will make use of four different instruments to obtain a comprehensive measure of sleeping patterns (two subjective and two objective ones)
- our results could give rise to new treatment opportunities, that aim at sleep improvement and management in order to prevent or reduce amyloid accumulation and in turn delay or even prevent the development of AD

## 1. INTRODUCTION

Alzheimer's disease (AD) is the most prevalent cause of dementia and currently affects approximately 36 million people worldwide (1). Thus far, no successful treatment is available. One of the major contributors to the neurodegeneration seen in the brains of AD patients is amyloid-beta ( $A\beta$ ) (2). The amyloid-cascade hypothesis characterizes amyloid accumulation as the fundamental initiating pathway for the development of AD (3). The reason why amyloid accumulates however is not clear yet. Recent evidence suggests that poor sleep might be one of the risk factors for amyloid accumulation and thereby increases the risk of AD development (4). Elderly people suffering from insomnia are more likely to develop AD compared to controls without insomnia (4). Furthermore, disrupted circadian rhythm among otherwise healthy individuals (5) and sleep-disordered breathing disorders (6) increase the chance of developing AD later in life. Poor sleep quality specifically has been shown to increase the risk of AD among older individuals (7-11). A recent meta-analysis of epidemiological studies found that poor sleep increased AD risk and that approximately 15% of cases of AD in the population might be attributable to sleep problems (12).

The effect of acute sleep deprivation on AD has been shown in both rodent and human studies, that investigated the effect of sleep and sleep deprivation on  $A\beta$  levels. Rodents and humans show fluctuations in  $A\beta$  levels over a 24-hour rhythm, where levels rise during wakefulness and decrease during sleep (13, 14). Following acute sleep deprivation, the drop in  $A\beta$  levels that would normally occur after sufficient sleep the following morning, was absent. Based on this evidence, chronic sleep disturbances might lead to a pronounced accumulation of  $A\beta$  in the brain, which in turn increases the risk to develop AD.

To date, observational and epidemiological studies have identified a relationship between poor sleep and the risk of developing AD. Experimental research has found that sleep deprivation and  $A\beta$  levels are related in both animals and humans. However, the direct effect of chronic partial sleep deprivation and its consequences on cognitive functioning, particularly the risk to develop AD later in life, has not been studied before.

In this article we describe the methodology and the participant cohort of the SCHIP (Sleep-Cognition Hypothesis In maritime Pilots) study. We designed the SCHIP study in order to investigate the effect

1  
2  
3 of long term work-related sleep loss on cognitive function, structural brain changes, and amyloid  
4 accumulation by using a unique cohort of healthy subjects with highly irregular shift work as maritime  
5 pilots. Because of the bi-directional nature of the relationship between sleep and AD, in which poor  
6 sleep is a symptom of the disease that precedes the clinical manifestation of AD, but might also be a  
7 risk factor that potentially contributes to the development of the disease, it is especially important to  
8 investigate the effects of sleep loss, caused by an external factor (work) and not by an intrinsic  
9 sleeping disorder (such as insomnia) that could be AD-related. Therefore participants in this study  
10 were selected based on their prolonged exposure to irregular maritime work-schedules. In this  
11 maritime pilot group, sleep loss is characterized as a combination of sleep deprivation, sleep restriction  
12 and sleep fragmentation or disruption. We will refer to these using the umbrella term 'sleep loss'  
13 throughout. An example of an individual working schedule from maritime pilot is shown in figure 1.  
14 Results and insights born from the SCHIP study could shed more light on sleep disturbance as one of  
15 the risk factors to develop AD and contribute to new and improved treatment strategies. In the SCHIP  
16 study we will investigate whether maritime pilots perform worse on cognitive assessment in  
17 comparison to a healthy control group and whether they have evidence of elevated brain amyloid  
18 concentrations and structural brain changes.

## 2. METHODS AND ANALYSIS

### 2.1. Participants

41  
42 Considering that this study is a proof of principle study, it is not possible to establish the exact effect  
43 size of the change in cognitive function we expect to see between the maritime pilots and the healthy  
44 controls.

45 To account for possible 10% withdrawal, we chose to have  $n=20$  participants in each arm.

46 In order to reach enough power to detect clinically relevant differences regarding the results of the  
47 PET-CT scan, we performed a sample size power calculation using G Power (version 3.1.9.3) (15).

48 Reported normal values (mean and standard deviation) for this age group in the literature vary between  
49 studies but are in the order of a mean standard uptake value (SUV) between 0.9 and 1.1 with standard  
50

1  
2  
3 deviations (SDs) in the range of 0.05 – 0.2. We define a relevant difference between maritime pilots  
4 and normal values to be 0.2 or more (an SUV of 1.3 or higher is considered as abnormal in most  
5 studies). This results in a large expected effect size (>0.8). The precise number of age- and education  
6 matched subjects in the database is not known yet but is estimated to be at least 50 (between 50 and  
7 100). We have applied a one-tailed test (it is not possible to have a SUV lower than normal values).  
8  
9 With an alpha of 0.05, with n=20 our power is 0.95 or higher (depending on the number of normal  
10 subjects). The lower level for power (0.85) is reached with 13-15 pilots.  
11  
12

13  
14 Based on these calculations, we will aim to recruit 20 pilots, allowing for drop-out of 5-7 pilots (either  
15 due to withdrawal of consent or artefacts in the PET-CT).  
16  
17

18  
19 Participants will be recruited within the national organization of Dutch Maritime Pilots (Nederlandse  
20 Loodswezen). We selected the maritime pilots as a suitable study population because of their unique  
21 irregular working schedule. They are called to work depending on the number and kind of ships that  
22 arrive. In a typical 7-day work week they have to be available 24 hours per day during which they can  
23 be called several times. This results in multiple divided short sleep periods over 24 hours during a  
24 work week, this is followed by a week off. An example of a workday of a maritime pilot is illustrated  
25 in figure 1.  
26  
27  
28  
29  
30  
31  
32  
33  
34  
35

36  
37 *Figure 1: Example maritime pilot working schedule. Working hours indicated in red.*  
38  
39

40  
41 The responsibility of a maritime pilot is to handle large international ships arriving by sea and to  
42 maneuver them into their final docking position in one of the Dutch harbors. This profession carries  
43 high responsibilities and requires accurate knowledge of the dimensions of the harbor and the ships  
44 besides technical knowledge and navigational skills. This results in irregular working schedules  
45 because guiding the ships is a time intensive procedure, that can take hours to complete. Maintaining  
46 this schedule for more than 15 years will result in chronic exposure to sleep loss, either due to partial  
47 sleep deprivation (missing a full night of sleep due to work), sleep restriction (a much shorter night of  
48 sleep than normal) or sleep fragmentation or disruption (short periods of sleep interrupted by calls to  
49 work).  
50  
51  
52  
53  
54  
55  
56  
57  
58  
59  
60



1  
2  
3 We will reach out to the whole maritime pilot community, in order to recruit pilots who are  
4 approximately 50 to 60 years old, with at least 15 years of uninterrupted work history as a maritime  
5 pilot.  
6  
7

8  
9 Additional inclusion criteria are not using neuro-active medications or psycho-stimulants,  
10 consumption of <14 alcoholic beverages per week, a body mass index of 18-30kg/m<sup>2</sup> and no  
11 subjective cognitive complaints (Cognitive Failure Questionnaire (CFQ <43). As control group, we  
12 will recruit 20 age, sex and education matched healthy adults with normal sleep indicated by a score of  
13 >5 on a subjective sleep questionnaire (Pittsburgh Sleep Quality Index, PSQI). The study protocol was  
14 approved by our institutional review board (NL55712.091.16, file number 2016-2337) and will be  
15 performed according to good clinical practice (GCP) rules. Inclusion of participants started in August  
16 2018 and we expect to complete the analysis of all data in August 2020.  
17  
18  
19  
20  
21  
22  
23  
24  
25  
26  
27

## 28 **2.2. Experimental Design**

29  
30 The aim of the SCHIP study is to investigate the relationship between long-term work exposure to  
31 irregular working schedules, cognitive function and amyloid accumulation among healthy middle-  
32 aged men to test the hypothesis that work-related prolonged sleep loss increases the risk of AD-related  
33 cognitive decline. In order to test this hypothesis, maritime pilots will have three visits and controls  
34 will have two visits (figure 2). During the first visit participants will complete general questionnaires  
35 about medical history, sleeping habits and cognitive state. Approximately 10 days after the first visit  
36 has taken place, participants are invited to the sleep center Kempenhaeghe (Heeze, The Netherlands)  
37 for the second visit. They will arrive at the sleep center at 19.00 h and complete a memory  
38 consolidation test (modified 'Doors Test') and a test for attentional performance (TAP 2.3) (16),  
39 followed by overnight polysomnography (PSG). Participants wake up at their normal wake time and  
40 complete a neuropsychological assessment after breakfast around 9.00h.  
41  
42  
43  
44  
45  
46  
47  
48  
49  
50  
51

52 Visit three (only for the maritime pilots) will be performed at the Radboud university medical center in  
53 Nijmegen (The Netherlands), where participants will undergo a standard amyloid PET-CT to measure  
54 brain amyloid accumulation and a 3T-MRI for coregistration. Participants are scheduled in their week  
55  
56  
57  
58  
59  
60

1  
2  
3 off in order to prevent short term effects of sleep disruption on amyloid concentrations in the brain  
4  
5 (17). They are instructed not eat or drink anything except from water 3 hours prior to the scan.  
6

7 *Figure 2: Overview experimental design*  
8  
9

### 10 **2.3 Patient and Public Involvement**

11 No patients were involved in this study because this study involves healthy participants.

12  
13 However, the participants' organization contacted us due to recent evidence from the literature on the  
14  
15 relationship between sleep and AD. They expressed their worries about their health and their own risk  
16  
17 of developing AD considering their irregular sleep. They reported feeling very tired at the end of a  
18  
19 work week and speculated that within their group of maritime pilots (including already retired pilots),  
20  
21 cases of dementia occurred more frequently than expected.  
22  
23

24  
25 Participants were also tightly involved in the design, realization and feasibility of the study. For  
26  
27 example, they were involved in choosing the technique to measure amyloid and expressed the  
28  
29 preference for a PET-CT scan over cerebrospinal fluid (CSF) measurements of amyloid.  
30

#### 31 Dissemination of results to participants:

32  
33 Results from the PSG measurements will be reported only to participants if we find abnormalities such  
34  
35 as apnea or sleeping disorders. This will be done by one of our sleep clinicians via telephone. Results  
36  
37 from the PET-CT scan will be disclosed via telephone by one of our clinicians as well. This is  
38  
39 according to the protocol that has been approved by the local ethical committee. Any incidental  
40  
41 findings on the PET-CT and/or MRI will be disseminated as well.  
42  
43  
44  
45

### 46 **2.4. Sleep Measurements**

47  
48 In order to obtain a comprehensive measure of sleeping patterns, we will use the Pittsburgh Sleep  
49  
50 Quality Index (PSQI) with questions about average sleeping behavior, including the report of bedtime,  
51  
52 get-up time, sleep latency, total sleep time, sleep disturbances (pain, breathing etc.) and use of sleep  
53  
54 medication. The maritime pilots will be instructed to fill in the questionnaire twice, once with regard  
55  
56 to a work week and once with regard to a week off. Additionally all participants are asked to maintain  
57  
58 a sleep-wake diary on a daily basis. In this diary they have to keep track of their bed times, the time it  
59  
60

1  
2  
3 took to fall asleep (sleep latency), the number of awakenings and their get up times. Furthermore they  
4 will receive an accelerometer, the Actiwatch 2 (Philips Respironics; Eindhoven, The Netherlands), in  
5 order to obtain more objective measurements of sleeping behavior. The Actiwatch is worn around the  
6 wrist and measures total sleep time and number of awakenings during sleep automatically based on  
7 movement. Participants are instructed to fill in the sleep diary and to wear the Actiwatch for 10 days  
8 preceding the second visit.  
9  
10  
11  
12  
13  
14  
15  
16  
17

## 18 **2.5. Cognitive assessment**

19 The neuropsychological assessment has been designed to measure the following cognitive domains,  
20 using validated Dutch versions of widely used neuropsychological tests. Episodic memory is assessed  
21 using the WMS-IV Logical Memory and the Rey-Auditory Verbal Learning Test (RAVLT). Working  
22 memory and executive function are measured by WAIS-IV Digit Span, Trail Making Test (TMT-A,  
23 TMT-B) and WAIS-IV Digit Symbol test. Semantic memory and language are assessed by letter  
24 fluency (D-A-T), semantic fluency (animal/profession naming) and the Boston Naming Test-Short  
25 Form (BNT) (18). Attentional performance is studied using the alertness test of the Test of Attentional  
26 Performance (TAP 2.3) (16). This test is conducted twice, once in the evening around 19.00 h and  
27 once in the morning around 9.00 h. In order to test overnight memory consolidation, a novel paradigm  
28 was developed based on the Doors Test, a visual recognition task developed by Baddely and  
29 colleagues (19) and extended using a validated database of 2000 pictures of doors (20). During the  
30 encoding trial, we present 120 pictures of doors that participants are instructed to remember. All  
31 targets (doors) are presented twice in a different, pseudo-randomized order. Targets are shown for 5  
32 seconds each, separated by a fixation cross presented for 1 second (figure 3). Approximately 10  
33 minutes after the encoding trial, participants are presented with 30 of the original doors and 15  
34 distracters (new pictures of doors, not presented before) that are randomly mixed. During this short-  
35 term recognition test, the task is to indicate whether the door had been presented before (oral response  
36 with 'yes') or not (oral response 'no'). For the long-term delayed recall, the same procedure is applied  
37 in the morning, using the other 90 original pictures, plus 45 new distracters (figure 3). Calculating the  
38 hits and false alarms, we compute the sensitivity ( $A'$ ) for short-term and for long-term delayed recall  
39  
40  
41  
42  
43  
44  
45  
46  
47  
48  
49  
50  
51  
52  
53  
54  
55  
56  
57  
58  
59  
60

( $A' = 0.5 + ((\text{hit-rate} - \text{false alarm rate}) \times (1 + \text{hit rate} - \text{false alarm rate})) / (4 \times \text{hit rate} \times (1 - \text{false alarm rate}))$ ).

### Figure 3: Memory Consolidation Task Design

A) Example of Encoding trials – 120 doors separated by fixation cross, B) Example of short-term recognition trials (after approx. 10 min) – oral response (pressing spacebar to move to next stimulus), 30 targets and 15 distracters, C) Example of long-term recognition trials (after one night) - oral response (pressing spacebar to move to next stimulus), 90 targets and 45 distracters

## 2.6. Amyloid PET-CT scan with co-registered magnetic resonance imaging (MRI)

Brain amyloid PET-CT scan will be performed to measure amyloid load. Participants will be scanned at the Radboudumc department of Radiology and Nuclear medicine on a PET scanner (Biograph mCT, Siemens, Erlangen, Germany). Subjects will receive an intravenous bolus of the well-validated PET tracer  $^{18}\text{F}$ -flutemetamol, and static brain images will be acquired from 90-110 min post-injection (frames of 5 mins), as recommended (see SPC;

[http://www.ema.europa.eu/docs/en\\_GB/document\\_library/EPAR\\_-\\_Product\\_Information/human/002557/WC500172950.pdf](http://www.ema.europa.eu/docs/en_GB/document_library/EPAR_-_Product_Information/human/002557/WC500172950.pdf)). The individual reconstructed PET images will be co-registered with individual structural  $T_1$  MRI scans.

The PET scans will be rated visually as positive or negative by an experienced nuclear medicine physician for the presence of amyloid depositions typical of AD. Scores will be expressed as a global SUV, which will be compared against population normative values, as earlier described (21). For quantitative purposes, grey matter volumes of interest will be defined on the individual MRIs (e.g. frontal brain areas, the precuneus, and hippocampus) as well as for cerebella grey matter (to assess non-specific uptake). The amyloid burden will be quantified using the standardized uptake value ratio, since it has been validated that this analysis method has comparable agreement with full kinetic modeling (22). Brain MRI will be performed on a 3 Tesla system (Magnetom Trio, Siemens, Erlangen, Germany). The structural  $T_1$ -weighted images will be used for co-registration purposes, and to define grey matter in the volumes of interest. In addition, these scans will be used to perform volumetric measurements (e.g. of the hippocampus). Also, arterial spin labeling (ASL) will be performed to measure global and regional cerebral blood flow (CBF), since reduced regional CBF is

1  
2  
3 an early marker of AD. Individual anatomic MRI scans will be co-registered with the individual PET  
4 scans using the image processing platform FSL ([fsl.fmrib.ox.ac.uk](http://fsl.fmrib.ox.ac.uk)) to calculate standard uptake value  
5 ratios. The PET-CT data will be expressed in Centiloid units to evaluate our data with historical  
6 control data as was recently validated by Battle and co-workers (23).  
7  
8  
9  
10

## 11 12 13 **2.7. Future follow-up visits**

14  
15 Because of the insufficient knowledge about the correlation between amyloid accumulation in the  
16 brain and the actual development of Alzheimer's disease, we decided to follow the maritime pilots in a  
17 5 year cycle in order to monitor any cognitive changes. We will contact them 3 times in total, which  
18 leaves us with a maximum follow-up period of 15 years. At each time point, they will be asked to  
19 answer 3 questions online:  
20  
21  
22  
23  
24

25  
26 1) Did you develop cognitive complaints over the last 5 years? This question will be further elaborated  
27 on with the Cognitive Failure Questionnaire (CFQ). The CFQ is a validated questionnaire that aims at  
28 detecting daily disruptions of cognitive functions. Participants are confronted with 25 statements and  
29 have to indicate how often they experience the situation that is described in the statements with a score  
30 between 0 (never) and 4 (very often).  
31  
32  
33  
34  
35

36  
37 2) Were you diagnosed with mild cognitive impairment during the last 5 years? If yes, when and what  
38 was the precise diagnosis?  
39

40  
41 3) Were you diagnosed with dementia in the past 5 years? If yes, when and what was the precise  
42 diagnosis?  
43  
44

45 If the answer is 'Yes' to one of these questions, we will reach out to the participants for clarification.  
46  
47  
48

## 49 **2.8. Statistical analysis**

50  
51 All analyses will be performed using IBM SPSS version 20.0 (SPSS Inc, Chicago, USA). Statistical  
52 significance is set at  $p < 0.05$ , with Bonferroni correction for multiple comparisons when appropriate,  
53 combined with reports of effect size and 95% confidence intervals. All continuous variables will be  
54 assessed for normal distribution by inspection of histograms and the Kolmogorov-Smirnov test.  
55  
56  
57  
58

59 Levene's test will be used to assess equality of variances. We will perform an independent samples t-  
60

1  
2  
3 test to compare all outcome parameters. The primary outcome for cognitive function will be the score  
4 on each test respectively adjusted for age and education. Regarding imaging, the primary outcome  
5 measure will be the visual read of the amyloid PET scans (positive or negative PET). Secondary  
6 outcome measurements will be quantitative PET (SUV ratios), brain volume (MRI), and CBF  
7 measurements (MRI-ASL).  
8  
9  
10  
11  
12

### 13 14 15 **3. ETHICS AND DISSEMINATION**

16  
17  
18 The study protocol was approved by our institutional review board, CMO (Commissie Mensgebonden  
19 Onderzoek) (NL55712.091.16, file number 2016-2337) and performed according to good clinical  
20 practice (GCP) rules. Written informed consent will be obtained from all participants. We are planning  
21 to publish the data and results of the SCHIP study in two or three articles in 2019 and 2020.  
22  
23  
24  
25  
26  
27  
28

### 29 **4. DISCUSSION**

30  
31  
32 In this article we presented the design and methodology of the SCHIP study. The main aim of the  
33 SCHIP study is to investigate the effect of long-term work related sleep loss on cognition and amyloid  
34 accumulation. Since previous studies assessed sleep deprivation for only one or a few days, the SCHIP  
35 study extends these studies by investigating the effect of long term sleep loss on cognitive function  
36 and amyloid accumulation. We expect that the maritime pilots have had long-term (>15 years)  
37 exposure to work related sleep loss, because of their work schedules and that this exposure has led to  
38 reduction in SWS. Every slow wave observed on an electro-encephalography (EEG) is a pause in  
39 synaptic activity (24). Synaptic activity and A $\beta$  levels appear strongly related, as A $\beta$  levels increase  
40 due to synaptic activity (25). More synaptic activity is observed during wakefulness, especially in the  
41 default mode network (DMN) or other highly interconnected brain areas (25). During sleep, synaptic  
42 activity is reduced, which could result in a decrease in A $\beta$  levels in the brain (25). Therefore, sleep  
43 loss (especially poor SWS) over the course of many years could increase A $\beta$  concentrations, which in  
44 turn could trigger AD-associated neurodegeneration and loss of cognitive function.  
45  
46  
47  
48  
49  
50  
51  
52  
53  
54  
55  
56  
57  
58  
59  
60

1  
2  
3 To test this hypothesis, we will perform extensive cognitive testing, using tests that are sensitive to  
4 subtle decline in episodic memory, which is affected early in AD. Additionally, amyloid positivity will  
5 be measured using amyloid PET-CT scans in order to explore the effect of work related sleep loss on  
6 amyloid concentration in the brain. Cerebral blood flow and cerebrovascular resistance will be  
7 investigated, as reductions in blood flow and increases in resistance occur early in the Alzheimer  
8 disease process (26). Finally, global grey matter volume and hippocampal volume will be measured.

9  
10  
11  
12  
13  
14  
15  
16 The unique cohort of maritime pilots will allow the prospective assessment of prolonged work-related  
17 sleep loss and its consequences for cognitive functioning and amyloid accumulation. The design of the  
18 SCHIP study presents a number of strengths. No other previous investigation has looked into the effect  
19 of chronic partial sleep deprivation on cognition in healthy men to this extent. Since sleep disorders  
20 might also be early symptoms of preclinical AD, it is especially important in this age group to  
21 investigate the effect of sleep loss due to an external factor and not due to intrinsic sleep disorders. All  
22 enrolled maritime pilots did not have any sleeping disorders and did not use sleep medication as  
23 confirmed by a general health questionnaire which was filled in upon screening for participation.  
24 Furthermore, we measure different domains of cognitive function (reaction time, visual memory,  
25 executive function, semantic memory and episodic memory) using sensitive and well-validated  
26 neuropsychological tasks. In addition to testing cognitive functions, we will perform brain imaging to  
27 detect amyloid accumulation as potential consequence of sleep loss. We will make use of four  
28 different instruments to get a comprehensive measure of sleeping patterns, two subjective and two  
29 objective ones. The subjective measurements consist of the PSQI and the maintenance of the sleep-  
30 wake diary. The objective assessments include the data from the Actiwatch 2 (Philips Respironics) in  
31 addition to a night of PSG. The data from the Actiwatch can be compared to the sleep-wake diary  
32 entries. These data can then be used to verify the sleeping behavior of participants, making sure they  
33 maintain regularity and consistency in their sleeping habits.

34  
35  
36  
37  
38  
39  
40  
41  
42  
43  
44  
45  
46  
47  
48  
49  
50  
51  
52  
53  
54  
55  
56  
57  
58  
59  
60  
61  
62  
63  
64  
65  
66  
67  
68  
69  
70  
71  
72  
73  
74  
75  
76  
77  
78  
79  
80  
81  
82  
83  
84  
85  
86  
87  
88  
89  
90  
91  
92  
93  
94  
95  
96  
97  
98  
99  
100  
101  
102  
103  
104  
105  
106  
107  
108  
109  
110  
111  
112  
113  
114  
115  
116  
117  
118  
119  
120  
121  
122  
123  
124  
125  
126  
127  
128  
129  
130  
131  
132  
133  
134  
135  
136  
137  
138  
139  
140  
141  
142  
143  
144  
145  
146  
147  
148  
149  
150  
151  
152  
153  
154  
155  
156  
157  
158  
159  
160  
161  
162  
163  
164  
165  
166  
167  
168  
169  
170  
171  
172  
173  
174  
175  
176  
177  
178  
179  
180  
181  
182  
183  
184  
185  
186  
187  
188  
189  
190  
191  
192  
193  
194  
195  
196  
197  
198  
199  
200  
201  
202  
203  
204  
205  
206  
207  
208  
209  
210  
211  
212  
213  
214  
215  
216  
217  
218  
219  
220  
221  
222  
223  
224  
225  
226  
227  
228  
229  
230  
231  
232  
233  
234  
235  
236  
237  
238  
239  
240  
241  
242  
243  
244  
245  
246  
247  
248  
249  
250  
251  
252  
253  
254  
255  
256  
257  
258  
259  
260  
261  
262  
263  
264  
265  
266  
267  
268  
269  
270  
271  
272  
273  
274  
275  
276  
277  
278  
279  
280  
281  
282  
283  
284  
285  
286  
287  
288  
289  
290  
291  
292  
293  
294  
295  
296  
297  
298  
299  
300  
301  
302  
303  
304  
305  
306  
307  
308  
309  
310  
311  
312  
313  
314  
315  
316  
317  
318  
319  
320  
321  
322  
323  
324  
325  
326  
327  
328  
329  
330  
331  
332  
333  
334  
335  
336  
337  
338  
339  
340  
341  
342  
343  
344  
345  
346  
347  
348  
349  
350  
351  
352  
353  
354  
355  
356  
357  
358  
359  
360  
361  
362  
363  
364  
365  
366  
367  
368  
369  
370  
371  
372  
373  
374  
375  
376  
377  
378  
379  
380  
381  
382  
383  
384  
385  
386  
387  
388  
389  
390  
391  
392  
393  
394  
395  
396  
397  
398  
399  
400  
401  
402  
403  
404  
405  
406  
407  
408  
409  
410  
411  
412  
413  
414  
415  
416  
417  
418  
419  
420  
421  
422  
423  
424  
425  
426  
427  
428  
429  
430  
431  
432  
433  
434  
435  
436  
437  
438  
439  
440  
441  
442  
443  
444  
445  
446  
447  
448  
449  
450  
451  
452  
453  
454  
455  
456  
457  
458  
459  
460  
461  
462  
463  
464  
465  
466  
467  
468  
469  
470  
471  
472  
473  
474  
475  
476  
477  
478  
479  
480  
481  
482  
483  
484  
485  
486  
487  
488  
489  
490  
491  
492  
493  
494  
495  
496  
497  
498  
499  
500  
501  
502  
503  
504  
505  
506  
507  
508  
509  
510  
511  
512  
513  
514  
515  
516  
517  
518  
519  
520  
521  
522  
523  
524  
525  
526  
527  
528  
529  
530  
531  
532  
533  
534  
535  
536  
537  
538  
539  
540  
541  
542  
543  
544  
545  
546  
547  
548  
549  
550  
551  
552  
553  
554  
555  
556  
557  
558  
559  
560  
561  
562  
563  
564  
565  
566  
567  
568  
569  
570  
571  
572  
573  
574  
575  
576  
577  
578  
579  
580  
581  
582  
583  
584  
585  
586  
587  
588  
589  
590  
591  
592  
593  
594  
595  
596  
597  
598  
599  
600  
601  
602  
603  
604  
605  
606  
607  
608  
609  
610  
611  
612  
613  
614  
615  
616  
617  
618  
619  
620  
621  
622  
623  
624  
625  
626  
627  
628  
629  
630  
631  
632  
633  
634  
635  
636  
637  
638  
639  
640  
641  
642  
643  
644  
645  
646  
647  
648  
649  
650  
651  
652  
653  
654  
655  
656  
657  
658  
659  
660  
661  
662  
663  
664  
665  
666  
667  
668  
669  
670  
671  
672  
673  
674  
675  
676  
677  
678  
679  
680  
681  
682  
683  
684  
685  
686  
687  
688  
689  
690  
691  
692  
693  
694  
695  
696  
697  
698  
699  
700  
701  
702  
703  
704  
705  
706  
707  
708  
709  
710  
711  
712  
713  
714  
715  
716  
717  
718  
719  
720  
721  
722  
723  
724  
725  
726  
727  
728  
729  
730  
731  
732  
733  
734  
735  
736  
737  
738  
739  
740  
741  
742  
743  
744  
745  
746  
747  
748  
749  
750  
751  
752  
753  
754  
755  
756  
757  
758  
759  
760  
761  
762  
763  
764  
765  
766  
767  
768  
769  
770  
771  
772  
773  
774  
775  
776  
777  
778  
779  
780  
781  
782  
783  
784  
785  
786  
787  
788  
789  
790  
791  
792  
793  
794  
795  
796  
797  
798  
799  
800  
801  
802  
803  
804  
805  
806  
807  
808  
809  
810  
811  
812  
813  
814  
815  
816  
817  
818  
819  
820  
821  
822  
823  
824  
825  
826  
827  
828  
829  
830  
831  
832  
833  
834  
835  
836  
837  
838  
839  
840  
841  
842  
843  
844  
845  
846  
847  
848  
849  
850  
851  
852  
853  
854  
855  
856  
857  
858  
859  
860  
861  
862  
863  
864  
865  
866  
867  
868  
869  
870  
871  
872  
873  
874  
875  
876  
877  
878  
879  
880  
881  
882  
883  
884  
885  
886  
887  
888  
889  
890  
891  
892  
893  
894  
895  
896  
897  
898  
899  
900  
901  
902  
903  
904  
905  
906  
907  
908  
909  
910  
911  
912  
913  
914  
915  
916  
917  
918  
919  
920  
921  
922  
923  
924  
925  
926  
927  
928  
929  
930  
931  
932  
933  
934  
935  
936  
937  
938  
939  
940  
941  
942  
943  
944  
945  
946  
947  
948  
949  
950  
951  
952  
953  
954  
955  
956  
957  
958  
959  
960  
961  
962  
963  
964  
965  
966  
967  
968  
969  
970  
971  
972  
973  
974  
975  
976  
977  
978  
979  
980  
981  
982  
983  
984  
985  
986  
987  
988  
989  
990  
991  
992  
993  
994  
995  
996  
997  
998  
999  
1000

Results of the SCHIP study will give us more insights into the consequences of long term work related  
sleep loss on cognitive function and amyloid accumulation in an AD related context. Our results could  
give rise to new treatment opportunities, that aim at sleep improvement and management in order to  
prevent or reduce amyloid accumulation and in turn delay or even prevent the development of AD.

## 5. REFERENCES

1. Prince M, Bryce R, Albanese E, Wimo A, Ribeiro W, Ferri CP. The global prevalence of dementia: a systematic review and metaanalysis. *Alzheimers Dement*. 2013;9(1):63-75. e2.
2. Jagust WJ, Mormino EC. Lifespan brain activity,  $\beta$ -amyloid, and Alzheimer's disease. *Trends Cogn Sci*. 2011;15(11):520-6.
3. Korczyn AD. The amyloid cascade hypothesis. *Alzheimers Dement*. 2008;4(3):176-8.
4. Osorio RS, Pirraglia E, Agüera-Ortiz LF, During EH, Sacks H, Ayappa I, et al. Greater risk of Alzheimer's disease in older adults with insomnia. *J Am Geriatr Soc*. 2011;59(3):559-62.
5. Tranah GJ, Blackwell T, Stone KL, Ancoli-Israel S, Paudel ML, Ensrud KE, et al. Circadian activity rhythms and risk of incident dementia and mild cognitive impairment in older women. *Ann Neurol*. 2011;70(5):722-32.
6. Yaffe K, Laffan AM, Harrison SL, Redline S, Spira AP, Ensrud KE, et al. Sleep-disordered breathing, hypoxia, and risk of mild cognitive impairment and dementia in older women. *Jama*. 2011;306(6):613-9.
7. Benedict C, Byberg L, Cedernaes J, Hogenkamp PS, Giedratis V, Kilander L, et al. Self-reported sleep disturbance is associated with Alzheimer's disease risk in men. *Alzheimers Dement*. 2015;11(9):1090-7.
8. Sterniczuk R, Theou O, Rusak B, Rockwood K. Sleep disturbance is associated with incident dementia and mortality. *Curr Alzheimer Res*. 2013;10(7):767-75.
9. Hahn EA, Wang H-X, Andel R, Fratiglioni L. A change in sleep pattern may predict Alzheimer disease. *The American Journal of Geriatric Psychiatry*. 2014;22(11):1262-71.
10. Potvin O, Lorrain D, Forget H, Dube M, Grenier S, Preville M, et al. Sleep quality and 1-year incident cognitive impairment in community-dwelling older adults. *Sleep*. 2012;35(4):491-9.
11. Ju Y-ES, McLeland JS, Toedebusch CD, Xiong C, Fagan AM, Duntley SP, et al. Sleep quality and preclinical Alzheimer disease. *JAMA neurology*. 2013;70(5):587-93.
12. Bubu OM, Brannick M, Mortimer J, Umasabor-Bubu O, Sebastião YV, Wen Y, et al. Sleep, cognitive impairment, and Alzheimer's disease: a systematic review and meta-analysis. *Sleep*. 2016;40(1):zsw032.
13. Kang J-E, Lim MM, Bateman RJ, Lee JJ, Smyth LP, Cirrito JR, et al. Amyloid- $\beta$  dynamics are regulated by orexin and the sleep-wake cycle. *Science* (80- ). 2009;326(5955):1005-7.
14. Ooms S, Overeem S, Besse K, Rikkert MO, Verbeek M, Claassen JA. Effect of 1 night of total sleep deprivation on cerebrospinal fluid  $\beta$ -amyloid 42 in healthy middle-aged men: a randomized clinical trial. *JAMA neurology*. 2014;71(8):971-7.
15. Faul F, Erdfelder E, Lang A-G, Buchner A. G\* Power 3: A flexible statistical power analysis program for the social, behavioral, and biomedical sciences. *Behav Res Methods*. 2007;39(2):175-91.
16. Zimmermann P, Fimm B. A test battery for attentional performance. *Applied neuropsychology of attention Theory, diagnosis and rehabilitation*. 2002:110-51.
17. Shokri-Kojori E, Wang G-J, Wiers CE, Demiral SB, Guo M, Kim SW, et al.  $\beta$ -Amyloid accumulation in the human brain after one night of sleep deprivation. *Proceedings of the National Academy of Sciences*. 2018;115(17):4483-8.
18. Bigler ED. Symptom validity testing, effort, and neuropsychological assessment. *J Int Neuropsychol Soc*. 2012;18(4):632-40.
19. Baddeley A, Emslie H, Nimmo-Smith I. *Doors and People: A Test of Visual and Verbal Recall and Recognition*, Thames Valley Test Company, Bury St. Edmunds, UK. 1994.
20. Baddeley AD, Hitch GJ, Quinlan PT, Bowes L, Stone R. *Doors for memory: A searchable database*. *The Quarterly Journal of Experimental Psychology*. 2016;69(11):2111-8.
21. Frings L, Hellwig S, Bormann T, Spehl TS, Buchert R, Meyer PT. Amyloid load but not regional glucose metabolism predicts conversion to Alzheimer's dementia in a memory clinic population. *Eur J Nucl Med Mol Imaging*. 2018;45(8):1442-8.



- 1  
2  
3 22. Cecchin D, Barthel H, Poggiali D, Cagnin A, Tiepolt S, Zucchetta P, et al. A new integrated dual  
4 time-point amyloid PET/MRI data analysis method. *Eur J Nucl Med Mol Imaging*. 2017;44(12):2060-  
5 72.  
6 23. Battle MR, Pillay LC, Lowe VJ, Knopman D, Kemp B, Rowe CC, et al. Centiloid scaling for  
7 quantification of brain amyloid with [18 F] flutemetamol using multiple processing methods. *EJNMMI*  
8 *Res*. 2018;8(1):107.  
9 24. Nir Y, Staba RJ, Andrillon T, Vyazovskiy VV, Cirelli C, Fried I, et al. Regional slow waves and  
10 spindles in human sleep. *Neuron*. 2011;70(1):153-69.  
11 25. Kang D, Lim HK, Jung WS, Jeong J-H, Kim TW, Han J-H, et al. Sleep and Alzheimer's Disease.  
12 *Sleep Medicine Research*. 2015;6(1):1-9.  
13 26. de Heus RA, de Jong DL, Sanders ML, van Spijker GJ, Oudegeest-Sander MH, Hopman MT, et  
14 al. Dynamic regulation of cerebral blood flow in patients with Alzheimer disease. *Hypertension*.  
15 2018;72(1):139-50.  
16  
17  
18  
19  
20  
21  
22  
23  
24  
25  
26  
27  
28  
29  
30  
31  
32  
33  
34  
35  
36  
37  
38  
39  
40  
41  
42  
43  
44  
45  
46  
47  
48  
49  
50  
51  
52  
53  
54  
55  
56  
57  
58  
59  
60

For peer review only

## 6. AUTHORS' CONTRIBUTION

Jana Thomas was involved in setting up the study, recruiting participants, gathering baseline characteristics, analyzing of first data and writing this manuscript.

Sharon Ooms helped with setting up the study, recruitment and design of the project and writing the first draft of the manuscript.

Marcel Verbeek contributed to the design of the study.

Jan Booij and Mark Rijpkema were major contributors in choosing and designing the right PET-CT/MRI procedure and wrote part of the manuscript.

Roy Kessels contributed to selecting the right neuropsychological tests, helped with the statistical analyzes of the first data and contributed to the revision of this manuscript.

Sebastiaan Overeem was a major contributor in setting up a collaboration with the sleeping center Kempenhaeghe (Heeze, The Netherlands) and helped revising the manuscript.

Jurgen Claassen was a major contributor in obtaining funding, setting up the study, designing the project and was extensively involved in writing and revising the manuscript.

All authors read and approved the final manuscript.

## 7. FUNDING STATEMENT

The SCHIP study is funded by ISAO (Internationale Stichting Alzheimer Onderzoek) (grant number 15040). Additional financial resources were provided by the Radboud University Medical Center (Nijmegen, The Netherlands).

## 8. COMPETING INTEREST STATEMENT

The authors declare that they have no competing interest.

1  
2  
3  
4  
5  
6  
7  
8  
9  
10  
11  
12  
13  
14  
15  
16  
17  
18  
19  
20  
21  
22  
23  
24  
25  
26  
27  
28  
29  
30  
31  
32  
33  
34  
35  
36  
37  
38  
39  
40  
41  
42  
43  
44  
45  
46  
47  
48  
49  
50  
51  
52  
53  
54  
55  
56  
57  
58  
59  
60

Figure 1: Example maritime Pilot working schedule. Working hours indicated in red.

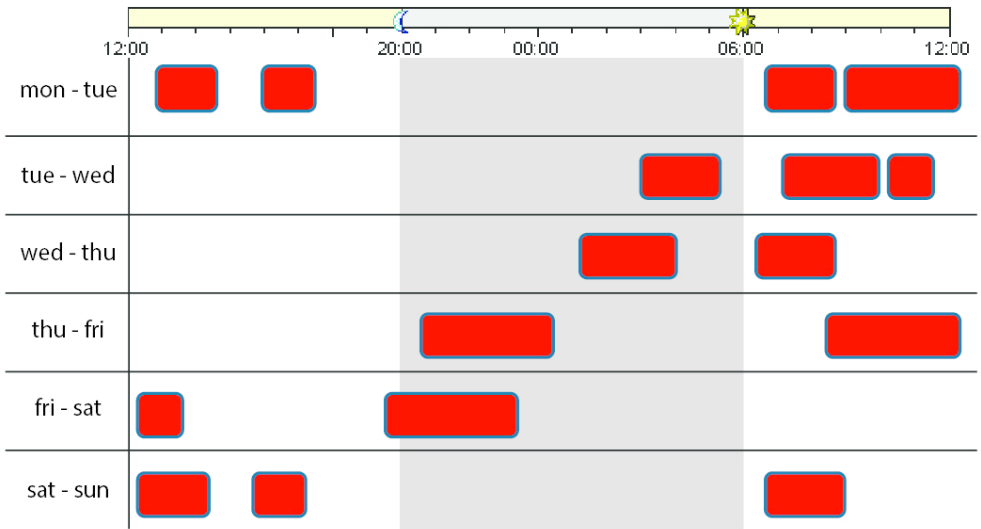

Figure 1: Example maritime pilot working schedule. Working hours indicated in red.

90x90mm (300 x 300 DPI)

Figure 2: Overview experimental design

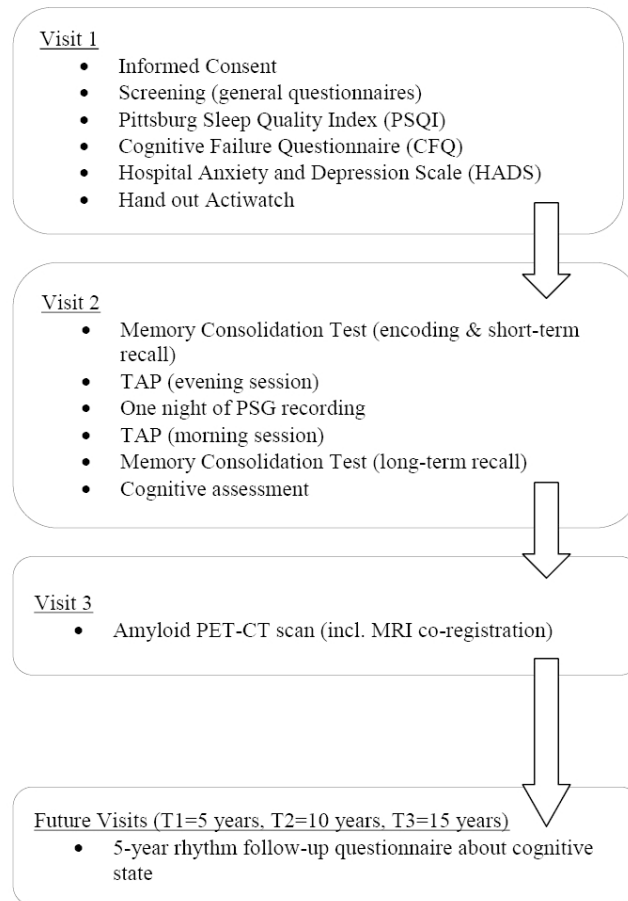

Figure 2: Overview experimental design

90x90mm (300 x 300 DPI)

Figure 3: Memory Consolidation Task Design

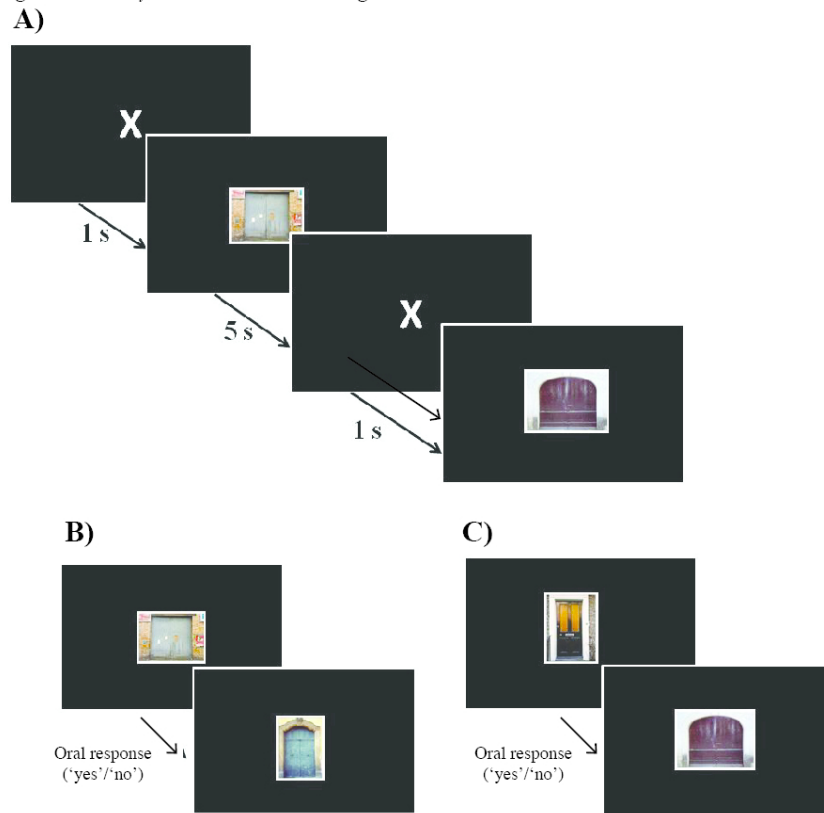

A) Example of Encoding trials - 120 doors separated by fixation cross, B) Example of short-term recognition trials (after approx. 10 min) - oral response (pressing spacebar to move to next stimulus), 30 targets and 15 distracters, C) Example of long-term recognition trials (after one night) - oral response (pressing spacebar to move to next stimulus), 90 targets and 45 distracters

Figure 3: Memory Consolidation Task Design

A) Example of Encoding trials - 120 doors separated by fixation cross, B) Example of short-term recognition trials (after approx. 10 min) - oral response (pressing spacebar to move to next stimulus), 30 targets and 15 distracters, C) Example of long-term recognition trials (after one night) - oral response (pressing spacebar to move to next stimulus), 90 targets and 45 distracters

90x90mm (300 x 300 DPI)
